# Supplementary material for: New dictyodendrins as BACE inhibitors from a southern Australian marine sponge, Ianthella sp.
Source: Royal Society of Chemistry journal article supplement (doi:10.1039/c2ra20322g), 2012-01-01
Supplement: c2ra20322g.pdf [file c2ra20322g.pdf]

## Electronic Supplementary Information

### New dictyodendrins as BACE inhibitors from a southern Australian marine sponge, *Ianthella* sp.

Hua Zhang, Melissa M. Conte, Zeinab Khalil, Xiao-Cong Huang and Robert J. Capon\*

*Division of Chemistry and Structural Biology, Institute for Molecular Bioscience, The University of Queensland, St. Lucia, Queensland 4072, Australia*

#### Scheme 1. Fractionation of *Ianthella* sp.

**Table S1a.**  $^1\text{H}$  NMR (methanol- $d_4$ , 600 MHz) data for dictyodendrin F (**1**).

**Table S1b.** 1D and 2D NMR (pyridine- $d_5$ , 600 MHz) data for dictyodendrin F (**1**).

**Table S2.** 1D and 2D NMR (pyridine- $d_5$ , 600 MHz) data for dictyodendrin G (**2**).

**Table S3.** 1D and 2D NMR (pyridine- $d_5$ , 600 MHz) data for dictyodendrin H (**3**).

**Table S4.** 1D and 2D NMR (pyridine- $d_5$ , 600 MHz) data for dictyodendrin I (**4**).

**Table S5.** 1D and 2D NMR (methanol- $d_4$ , 600 MHz) data for dictyodendrin J (**5**).

**Figure S1a.**  $^1\text{H}$  NMR (methanol- $d_4$ , 600 MHz) spectrum for dictyodendrin F (**1**).

**Figure S1b.**  $^1\text{H}$  NMR (pyridine- $d_5$ , 600 MHz) spectrum for dictyodendrin F (**1**).

**Figure S1c.**  $^1\text{H}$  NMR (pyridine- $d_5$ , 600 MHz) expansion for dictyodendrin F (**1**).

**Figure S1d.**  $^{13}\text{C}$  NMR (pyridine- $d_5$ , 100 MHz) spectrum for dictyodendrin F (**1**).

**Figure S1e.**  $^{13}\text{C}$  NMR (pyridine- $d_5$ , 100 MHz) expansion for dictyodendrin F (**1**).

**Figure S1f.** gCOSY (pyridine- $d_5$ , 600 MHz) spectrum for dictyodendrin F (**1**).

**Figure S1g.** HSQC (pyridine- $d_5$ , 600 MHz) spectrum for dictyodendrin F (**1**).

**Figure S1h.** HSQC (pyridine- $d_5$ , 600 MHz) expansion for dictyodendrin F (**1**).

**Figure S1i.** HMBC (pyridine- $d_5$ , 600 MHz) spectrum for dictyodendrin F (**1**).

**Figure S1j.** HMBC (pyridine- $d_5$ , 600 MHz) expansion for dictyodendrin F (**1**).

**Figure S2.**  $^1\text{H}$  NMR (pyridine- $d_5$ , 600 MHz) spectrum for dictyodendrin G (**2**).

**Figure S3.**  $^1\text{H}$  NMR (pyridine- $d_5$ , 600 MHz) spectrum for dictyodendrin H (**3**).

**Figure S4.**  $^1\text{H}$  NMR (pyridine- $d_5$ , 600 MHz) spectrum for dictyodendrin I (**4**).

**Figure S5.**  $^1\text{H}$  NMR (methanol- $d_4$ , 600 MHz) spectrum for dictyodendrin J (**5**).

**Figure S6.** BACE screening results for compounds **1–5**.

**Figure S7.** Antibacterial and antifungal screening results for compounds **1–5**.

---

\* To whom all correspondence should be addressed. Ph: +61 7 3346 2979, Fax: +61 7 3346 2090, Email: [r.capon@uq.edu.au](mailto:r.capon@uq.edu.au)

### Scheme 1. Fractionation of *Ianthella* sp.

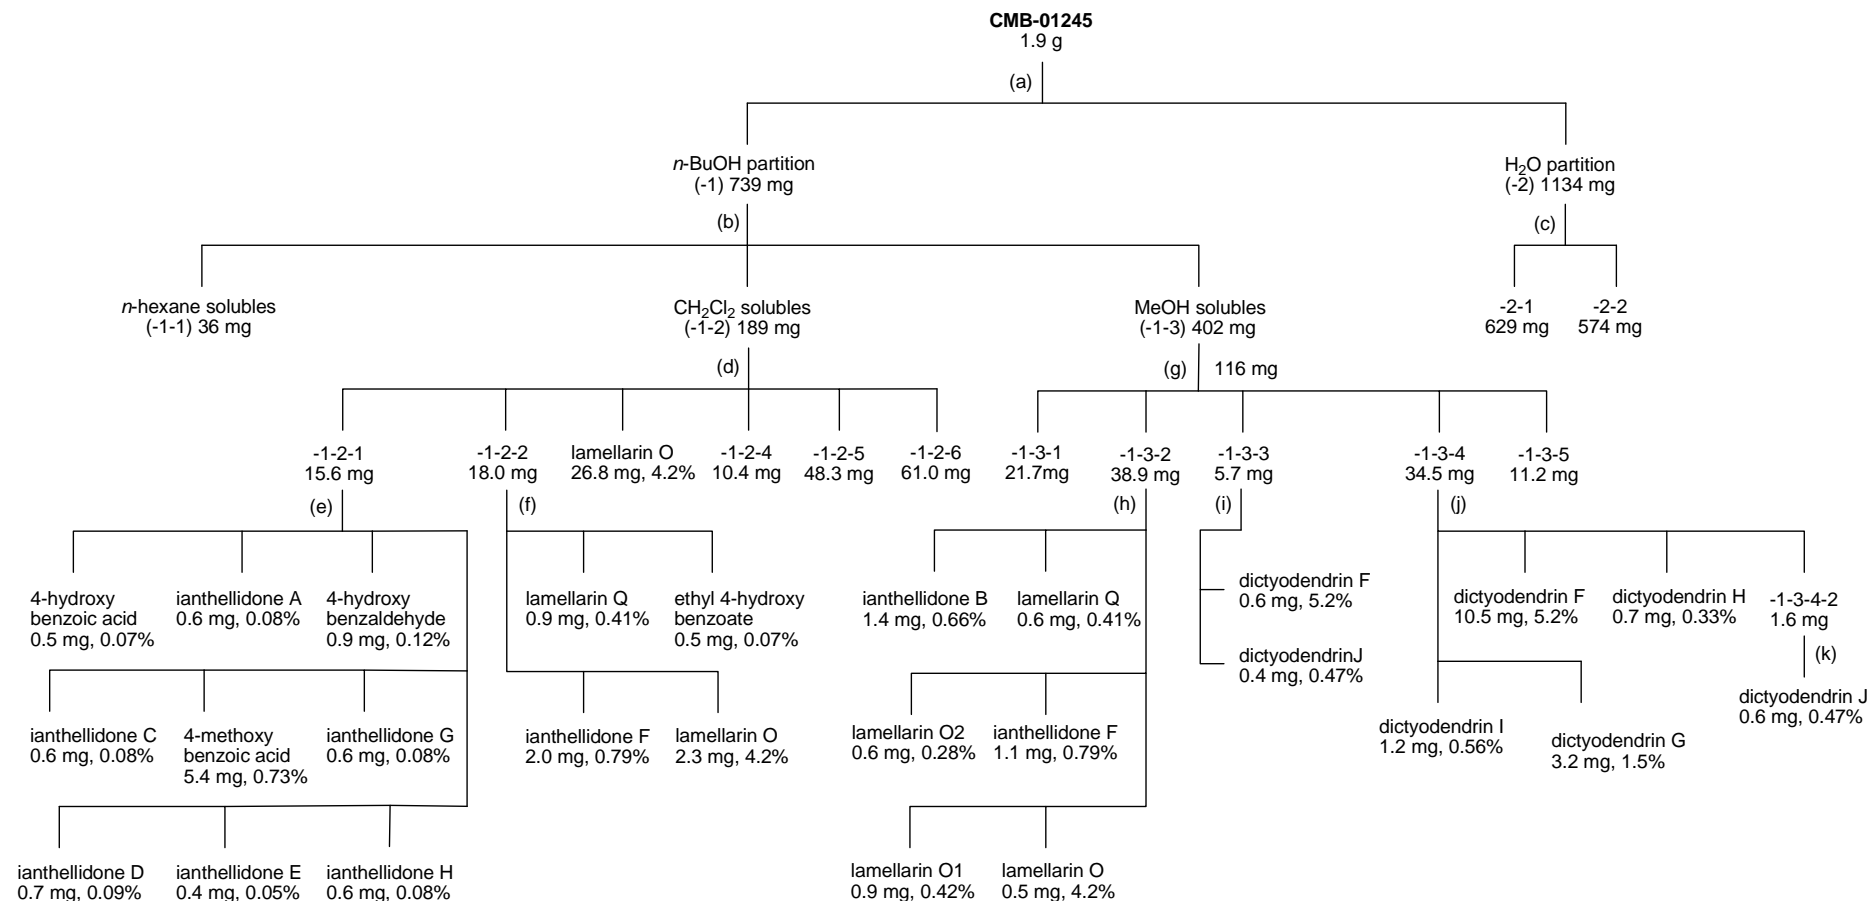

- (a) Partition [*n*-BuOH (-1) and H<sub>2</sub>O (-2)].  
 (b) Trituration [*n*-hexane (-1-1), CH<sub>2</sub>Cl<sub>2</sub> (-1-2), and MeOH (-1-3)].  
 (c) Trituration [MeOH (-2-1), H<sub>2</sub>O (-2-2)].  
 (d) SPE fractionation [Alltech 5g C18 SPE cartridge, from 30% MeOH/H<sub>2</sub>O with 10% increment to MeOH, each 10 mL elution]  
 (e) HPLC separation [Zorbax SB-C18, 4 mL/min., 20-40% MeCN/H<sub>2</sub>O (0.01% TFA) in 15 min, detect at 230, 254, 280 and 330 nm]  
 (f) HPLC separation [Zorbax SB-C18, 4 mL/min., 30-45% MeCN/H<sub>2</sub>O in 15 min. then change to 60% MeCN/H<sub>2</sub>O in 1 min. and then hold for 4 min, detect at 230, 254, 280 and 330 nm]  
 (g) SPE fractionation [Alltech 5g C18 SPE cartridge, from 30% MeOH/H<sub>2</sub>O with 10% increment to MeOH, each 10 mL elution]  
 (h) HPLC separation [Zorbax SB-C18, 4 mL/min., 25-50% MeCN/H<sub>2</sub>O in 15 min, detect at 210, 230 and 330 nm]  
 (i) HPLC separation [Zorbax SB-C18, 4 mL/min., 40-60% MeCN/H<sub>2</sub>O in 15 min, detect at 210, 230 and 330 nm]  
 (j) HPLC separation [Zorbax SB-C18, 4 mL/min., 40-60% MeCN/H<sub>2</sub>O in 15 min, detect at 230, 254, 280 and 330 nm]  
 (k) HPLC separation [Sc-C18-A1, 1 mL/min., 60-90% MeOH/H<sub>2</sub>O (0.01% TFA) in 15 min, detect at 210, 230 and 330 nm]

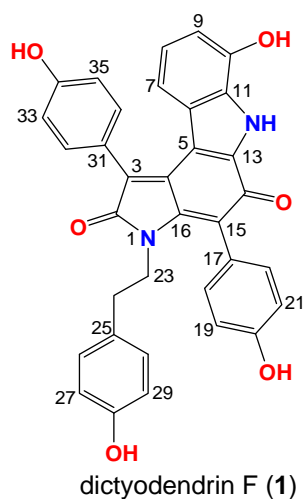

**Table S1a.**  $^1\text{H}$  NMR (methanol- $d_4$ , 600 MHz) data for dictyodendrin F (1).

| No    | <b>1 (Experimental)</b><br>$\delta_{\text{H}}$ (m, <i>J</i> (Hz)) | <b>1 (Literature)</b> <sup>1</sup><br>$\delta_{\text{H}}$ (m, <i>J</i> (Hz)) |
|-------|-------------------------------------------------------------------|------------------------------------------------------------------------------|
| 7     | 5.83 (dd, 7.8, 1.2)                                               | 5.82 (dd, 7.3, 1.9)                                                          |
| 8     | 6.55-6.60*                                                        | 6.58 (t, 7.3)                                                                |
| 9     | 6.55-6.60*                                                        | 6.57 (dd, 7.3, 1.9)                                                          |
| 18/22 | 7.25 (d, 8.6)                                                     | 7.24 (d, 8.5)                                                                |
| 19/21 | 6.94 (d, 8.6)                                                     | 6.93 (d, 8.5)                                                                |
| 23    | 3.43 (t like, 7.8)                                                | 3.42 (t, 7.8)                                                                |
| 24    | 2.41 (t like, 7.8)                                                | 2.40 (t, 7.8)                                                                |
| 26/30 | 6.55-6.60*                                                        | 6.56 (d, 8.5)                                                                |
| 27/29 | 6.66 (d, 8.5)                                                     | 6.66 (d, 8.5)                                                                |
| 32/36 | 7.32 (d, 8.6)                                                     | 7.31 (d, 8.5)                                                                |
| 33/35 | 6.90 (d, 8.6)                                                     | 6.89 (d, 8.5)                                                                |

\* Overlapping signals

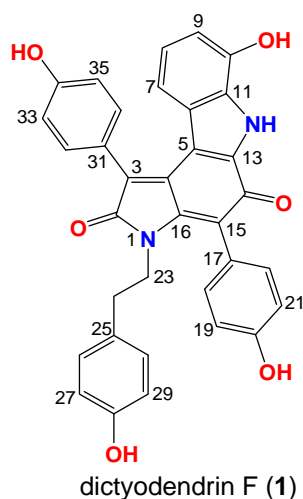

**Table S1b.** 1D and 2D NMR (pyridine-*d*<sub>5</sub>, 600 MHz) data for dictyodendrin F (1).

| No.   | $\delta_C^A$       | $\delta_H^B$ (m, <i>J</i> (Hz)) | COSY     | HMBC ( <sup>1</sup> H to <sup>13</sup> C) |
|-------|--------------------|---------------------------------|----------|-------------------------------------------|
| 2     | 172.3              |                                 |          |                                           |
| 3     | 128.9              |                                 |          |                                           |
| 4     | 134.9 <sup>C</sup> |                                 |          |                                           |
| 5     | 114.0              |                                 |          |                                           |
| 6     | 126.7              |                                 |          |                                           |
| 7     | 116.4              | 6.66 (d, 8.2)                   | H-8      | C-5, C-6, C-9, C-11                       |
| 8     | 122.9              | 6.96 (dd, 8.2, 7.5)             | H-7, H-9 | C-6, C-10                                 |
| 9     | 109.9              | 7.05 (d, 7.5)                   | H-8      | C-7, C-10, C-11                           |
| 10    | 147.1              |                                 |          |                                           |
| 11    | 131.7              |                                 |          |                                           |
| 13    | 134.2 <sup>C</sup> |                                 |          |                                           |
| 14    | 180.4              |                                 |          |                                           |
| 15    | 118.5              |                                 |          |                                           |
| 16    | 149.6              |                                 |          |                                           |
| 17    | 124.2              |                                 |          |                                           |
| 18/22 | 133.9              | 7.65 (d, 8.3)                   | H-19/21  | C-15, C-19/21, C-20                       |
| 19/21 | 116.3              | 7.36 (d, 8.3)                   | H-18/22  | C-17, C-20                                |
| 20    | 159.8              |                                 |          |                                           |
| 23    | 44.0               | 3.86 (t, 8.1)                   | H-24     | C-2, C-16, C-24, C-25                     |
| 24    | 35.0               | 2.76 (t, 8.1)                   | H-23     | C-23, C-25, C-26/30                       |
| 25    | 129.6              |                                 |          |                                           |
| 26/30 | 130.9              | 7.05 (d, 8.3)                   | H-27/29  | C-24, C-28                                |
| 27/29 | 116.6              | 7.09 (d, 8.3)                   | H-26/30  | C-25, C-28                                |
| 28    | 157.9              |                                 |          |                                           |
| 31    | 123.7              |                                 |          |                                           |
| 32/36 | 133.8              | 7.92 (d, 8.3)                   | H-33/35  | C-3, C-33/35, C-34                        |
| 33/35 | 116.6              | 7.38 (d, 8.3)                   | H-32/36  | C-31, C-34                                |
| 34    | 160.8              |                                 |          |                                           |

<sup>A</sup> <sup>13</sup>C NMR assignments were supported by HSQC experiment; <sup>B</sup> 12-NH and 10, 20, 28 and 34-OH were all resolved as very broadened peaks at 14.54, 12.46, 12.18, 11.90 and 11.28 ppm, respectively, and could not be assigned; <sup>C</sup> Interchangeable signals within the column.

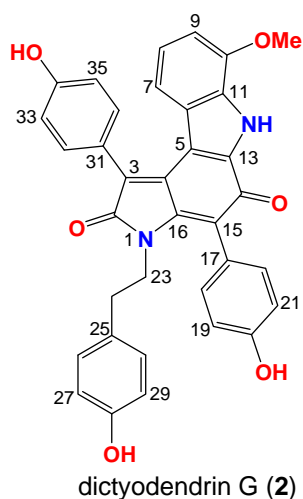

**Table S2.** 1D and 2D NMR (pyridine-*d*<sub>5</sub>, 600 MHz) data for dictyodendrin G (2).

| No.    | $\delta_{\text{C}}^{\text{A}}$ | $\delta_{\text{H}}$ (m, <i>J</i> (Hz)) | COSY     | HMBC ( <sup>1</sup> H to <sup>13</sup> C) |
|--------|--------------------------------|----------------------------------------|----------|-------------------------------------------|
| 2      | 172.2                          |                                        |          |                                           |
| 3      | 129.2                          |                                        |          |                                           |
| 4      | 134.6 <sup>B</sup>             |                                        |          |                                           |
| 5      | 113.9                          |                                        |          |                                           |
| 6      | 126.0                          |                                        |          |                                           |
| 7      | 117.7                          | 6.64 (d, 8.3)                          | H-8      | C-5, C-6, C-9, C-11                       |
| 8      | 122.4                          | 6.91 (dd, 8.3, 7.7)                    | H-7, H-9 | C-6, C-9, C-10                            |
| 9      | 105.5                          | 6.76 (d, 7.7)                          | H-8      | C-7, C-10, C-11                           |
| 10     | 148.4                          |                                        |          |                                           |
| 11     | 131.0                          |                                        |          |                                           |
| 13     | 134.2 <sup>B</sup>             |                                        |          |                                           |
| 14     | 180.2                          |                                        |          |                                           |
| 15     | 118.5                          |                                        |          |                                           |
| 16     | 149.4                          |                                        |          |                                           |
| 17     | 124.0                          |                                        |          |                                           |
| 18/22  | 133.8                          | 7.62 (d, 8.2)                          | H-19/21  | C-15, C-19/21, C-20                       |
| 19/21  | 116.3                          | 7.35 (d, 8.2)                          | H-18/22  | C-17, C-20                                |
| 20     | 159.7                          |                                        |          |                                           |
| 23     | 43.9                           | 3.83 (t, 8.1)                          | H-24     | C-2, C-16, C-24, C-25                     |
| 24     | 35.0                           | 2.73 (t, 8.1)                          | H-23     | C-23, C-25, C-26/30                       |
| 25     | 129.4                          |                                        |          |                                           |
| 26/30  | 130.8                          | 7.03 (d, 8.3)                          | H-27/29  | C-24, C-28                                |
| 27/29  | 116.5                          | 7.09 (d, 8.3)                          | H-26/30  | C-25, C-28                                |
| 28     | 157.8                          |                                        |          |                                           |
| 31     | 123.5                          |                                        |          |                                           |
| 32/36  | 133.7                          | 7.88 (d, 8.4)                          | H-33/35  | C-3, C-33/35, C-34                        |
| 33/35  | 116.6                          | 7.39 (d, 8.4)                          | H-32/36  | C-31, C-34                                |
| 34     | 160.8                          |                                        |          |                                           |
| 10-OMe | 55.8                           | 3.86 (s)                               |          | C-10                                      |

<sup>A</sup> <sup>13</sup>C NMR assignments were supported by HSQC experiment; <sup>B</sup> Interchangeable signals within the column.

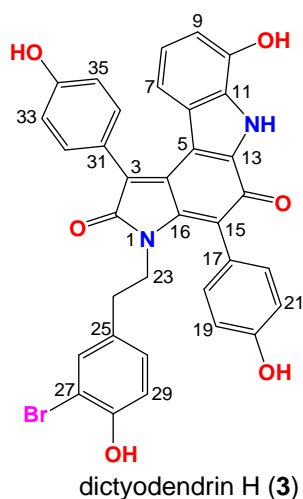

**Table S3.** 1D and 2D NMR (pyridine- $d_5$ , 600 MHz) data for dictyodendrin H (3).

| No.   | $\delta_C^A$ | $\delta_H$ (m, $J$ (Hz)) | COSY     | HMBC ( $^1H$ to $^{13}C$ ) |
|-------|--------------|--------------------------|----------|----------------------------|
| 2     | 172.1        |                          |          |                            |
| 3     | 128.8        |                          |          |                            |
| 4     | ND           |                          |          |                            |
| 5     | 113.8        |                          |          |                            |
| 6     | 126.6        |                          |          |                            |
| 7     | 116.3        | 6.64 (d, 8.2)            | H-8      | C-5, C-9, C-11             |
| 8     | 122.9        | 6.94 (dd, 8.2, 7.6)      | H-7, H-9 | C-6, C-9, C-10             |
| 9     | 109.9        | 7.06 (d, 7.6)            | H-8      | C-7, C-10, C-11            |
| 10    | 146.9        |                          |          |                            |
| 11    | 131.5        |                          |          |                            |
| 13    | ND           |                          |          |                            |
| 14    | ND           |                          |          |                            |
| 15    | 118.4        |                          |          |                            |
| 16    | 149.2        |                          |          |                            |
| 17    | 124.0        |                          |          |                            |
| 18/22 | 133.8        | 7.63 (d, 8.5)            | H-19/21  | C-15, C-20                 |
| 19/21 | 116.3        | 7.38 (d, 8.5)            | H-18/22  | C-17, C-20                 |
| 20    | 159.7        |                          |          |                            |
| 23    | 43.6         | 3.81 (t, 8.2)            | H-24     | C-2, C-16                  |
| 24    | 34.5         | 2.69 (t, 8.2)            | H-23     | C-23, C-25, C-26, C-30     |
| 25    | 131.1        |                          |          |                            |
| 26    | 134.1        | 7.37 (d, 2.1)            |          | C-24, C-27, C-28, C-30     |
| 27    | 111.3        |                          |          |                            |
| 28    | 154.4        |                          |          |                            |
| 29    | 117.0        | 7.08 (d, 8.2)            | H-30     | C-25, C-27                 |
| 30    | 129.8        | 6.92 (dd, 8.2, 2.1)      | H-29     | C-24, C-26, C-28           |
| 31    | 123.6        |                          |          |                            |
| 32/36 | 133.8        | 7.91 (d, 8.6)            | H-33/35  | C-3, C-34                  |
| 33/35 | 116.6        | 7.39 (d, 8.6)            | H-32/36  | C-31, C-34                 |
| 34    | 160.7        |                          |          |                            |

<sup>A</sup>  $^{13}C$  NMR assignments were supported by HSQC experiment; <sup>ND</sup> Signals not detected.

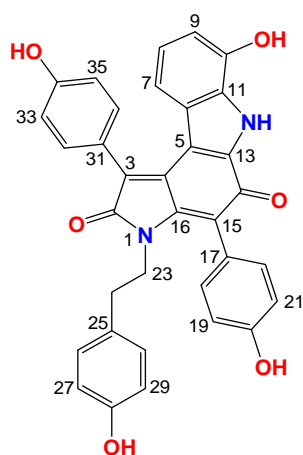

dictyodendrin I (**4**)

**Table S4.** 1D and 2D NMR (pyridine-*d*<sub>5</sub>, 600 MHz) data for dictyodendrin I (**4**).

| No.   | $\delta_C^A$       | $\delta_H$ (m, <i>J</i> (Hz)) | COSY     | HMBC ( <sup>1</sup> H to <sup>13</sup> C) |
|-------|--------------------|-------------------------------|----------|-------------------------------------------|
| 2     | 172.3              |                               |          |                                           |
| 3     | 128.8              |                               |          |                                           |
| 4     | 134.9 <sup>B</sup> |                               |          |                                           |
| 5     | 113.9              |                               |          |                                           |
| 6     | 126.6              |                               |          |                                           |
| 7     | 116.4              | 6.65 (d, 8.2)                 | H-8      | C-5, C-6, C-9, C-11                       |
| 8     | 123.0              | 6.93 (dd, 8.2, 7.6)           | H-7, H-9 | C-6, C-9, C-10                            |
| 9     | 109.9              | 7.06 (d, 7.6)                 | H-8      | C-7, C-10, C-11                           |
| 10    | 147.0              |                               |          |                                           |
| 11    | 131.6              |                               |          |                                           |
| 13    | 134.1 <sup>B</sup> |                               |          |                                           |
| 14    | 180.3              |                               |          |                                           |
| 15    | 118.5              |                               |          |                                           |
| 16    | 149.4              |                               |          |                                           |
| 17    | 124.0              |                               |          |                                           |
| 18/22 | 133.8              | 7.62 (d, 8.3)                 | H-19/21  | C-15, C-20                                |
| 19/21 | 116.3              | 7.38 (d, 8.3)                 | H-18/22  | C-17, C-20                                |
| 20    | 159.8              |                               |          |                                           |
| 23    | 43.7               | 3.81 (t, 8.1)                 | H-24     | C-2, C-16, C-24                           |
| 24    | 34.3               | 2.68 (t, 8.1)                 | H-23     | C-23, C-25, C-26, C-30                    |
| 25    | 131.8              |                               |          |                                           |
| 26    | 140.3              | 7.66 (d, 1.9)                 |          | C-24, C-27, C-28, C-30                    |
| 27    | 86.3               |                               |          |                                           |
| 28    | 157.2              |                               |          |                                           |
| 29    | 115.8              | 7.02 (d, 8.2)                 | H-30     | C-25, C-27, C-28 <sup>W</sup>             |
| 30    | 130.8              | 6.95 (dd, 8.2, 1.9)           | H-29     | C-24, C-26, C-28                          |
| 31    | 123.6              |                               |          |                                           |
| 32/36 | 133.8              | 7.92 (d, 8.5)                 | H-33/35  | C-3, C-34                                 |
| 33/35 | 116.5              | 7.39 (d, 8.5)                 | H-32/36  | C-31, C-34                                |
| 34    | 160.7              |                               |          |                                           |

<sup>A</sup> <sup>13</sup>C NMR assignments were supported by HSQC experiment; <sup>B</sup> Interchangeable signals within the column.

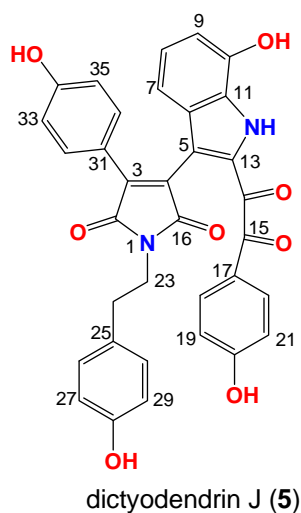

**Table S5.** 1D and 2D NMR (MeOH-*d*<sub>4</sub>, 600 MHz) data for dictyodendrin J (**5**).

| No.   | $\delta_C^A$       | $\delta_H$ (m, <i>J</i> (Hz)) | COSY     | HMBC ( <sup>1</sup> H to <sup>13</sup> C) |
|-------|--------------------|-------------------------------|----------|-------------------------------------------|
| 2     | 172.3              |                               |          |                                           |
| 3     | 138.5              |                               |          |                                           |
| 4     | 129.6 <sup>B</sup> |                               |          |                                           |
| 5     | 114.8              |                               |          |                                           |
| 6     | 129.4              |                               |          |                                           |
| 7     | 114.2              | 6.53 (dd, 8.1, 0.7)           | H-8      | C-5, C-6, C-9, C-11                       |
| 8     | 123.7              | 6.82 (dd, 8.1, 7.5)           | H-7, H-9 | C-6, C-10                                 |
| 9     | 111.2              | 6.71 (dd, 7.5, 0.7)           | H-8      | C-7, C-10, C-11                           |
| 10    | 145.9              |                               |          |                                           |
| 11    | 130.6              |                               |          |                                           |
| 13    | <sup>B, ND</sup>   |                               |          |                                           |
| 14    | 187.0              |                               |          |                                           |
| 15    | 192.4              |                               |          |                                           |
| 16    | 172.3              |                               |          |                                           |
| 17    | 126.0              |                               |          |                                           |
| 18/22 | 134.3              | 7.76 (d, 8.9)                 | H-19/21  | C-15, C-20                                |
| 19/21 | 116.8              | 6.79 (d, 8.9)                 | H-18/22  | C-17, C-20                                |
| 20    | 165.5              |                               |          |                                           |
| 23    | 41.0               | 3.57 (t, 7.6)                 |          | C-2, C-16, C-24, C-25                     |
| 24    | 34.8               | 2.58 (br s)                   |          |                                           |
| 25    | 130.5              |                               |          |                                           |
| 26/30 | 131.0              | 6.96 (d, 8.5)                 | H-27/29  | C-24, C-27/29, C-28                       |
| 27/29 | 116.4              | 6.70 (d, 8.5)                 | H-26/30  | C-25, C-28                                |
| 28    | 157.2              |                               |          |                                           |
| 31    | 121.9              |                               |          |                                           |
| 32/36 | 132.9              | 7.35 (d, 8.9)                 | H-33/35  | C-3, C-34                                 |
| 33/35 | 116.4              | 6.59 (d, 8.9)                 | H-32/36  | C-31, C-34                                |
| 34    | 160.8              |                               |          |                                           |

<sup>A</sup> <sup>13</sup>C NMR assignments were supported by HSQC experiment; <sup>B</sup> Interchangeable signals within the column; <sup>ND</sup> Signals not detected.



**Figure S1a.**  $^1\text{H}$  NMR (methanol- $d_4$ , 600 MHz) spectrum for dictyodendrin F (**1**).

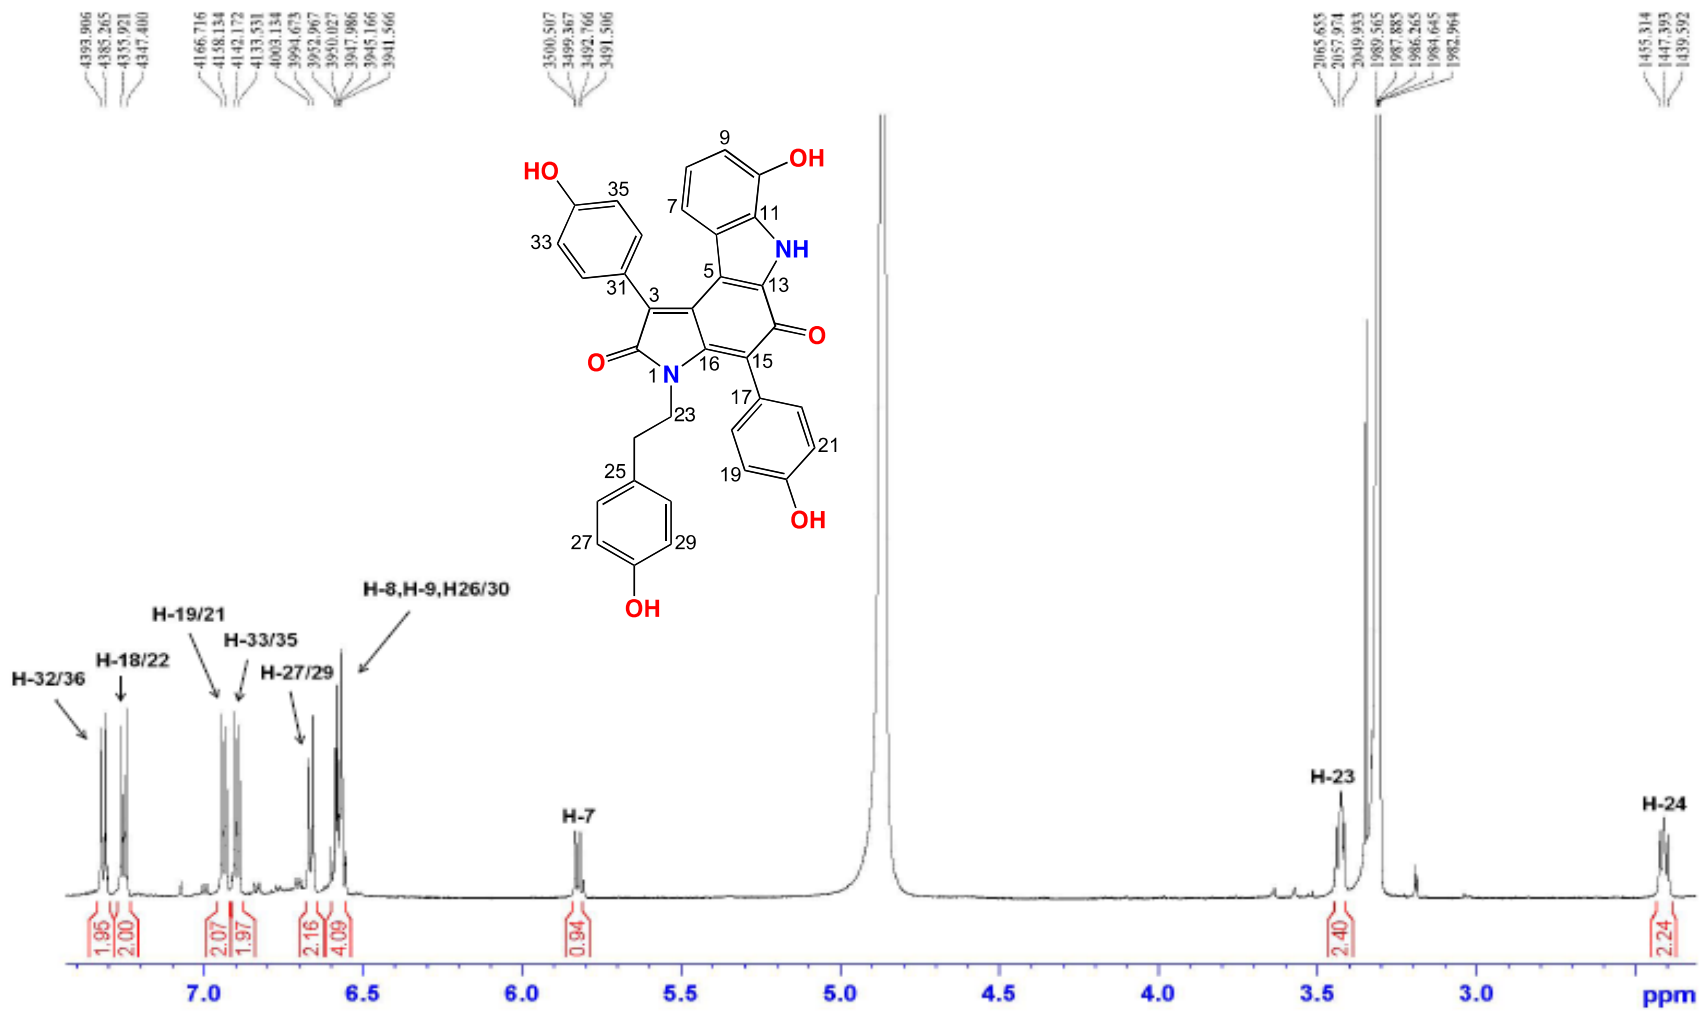

**Figure S1b.**  $^1\text{H}$  NMR (pyridine- $d_5$ , 600 MHz) spectrum for dictyodendrin F (**1**).

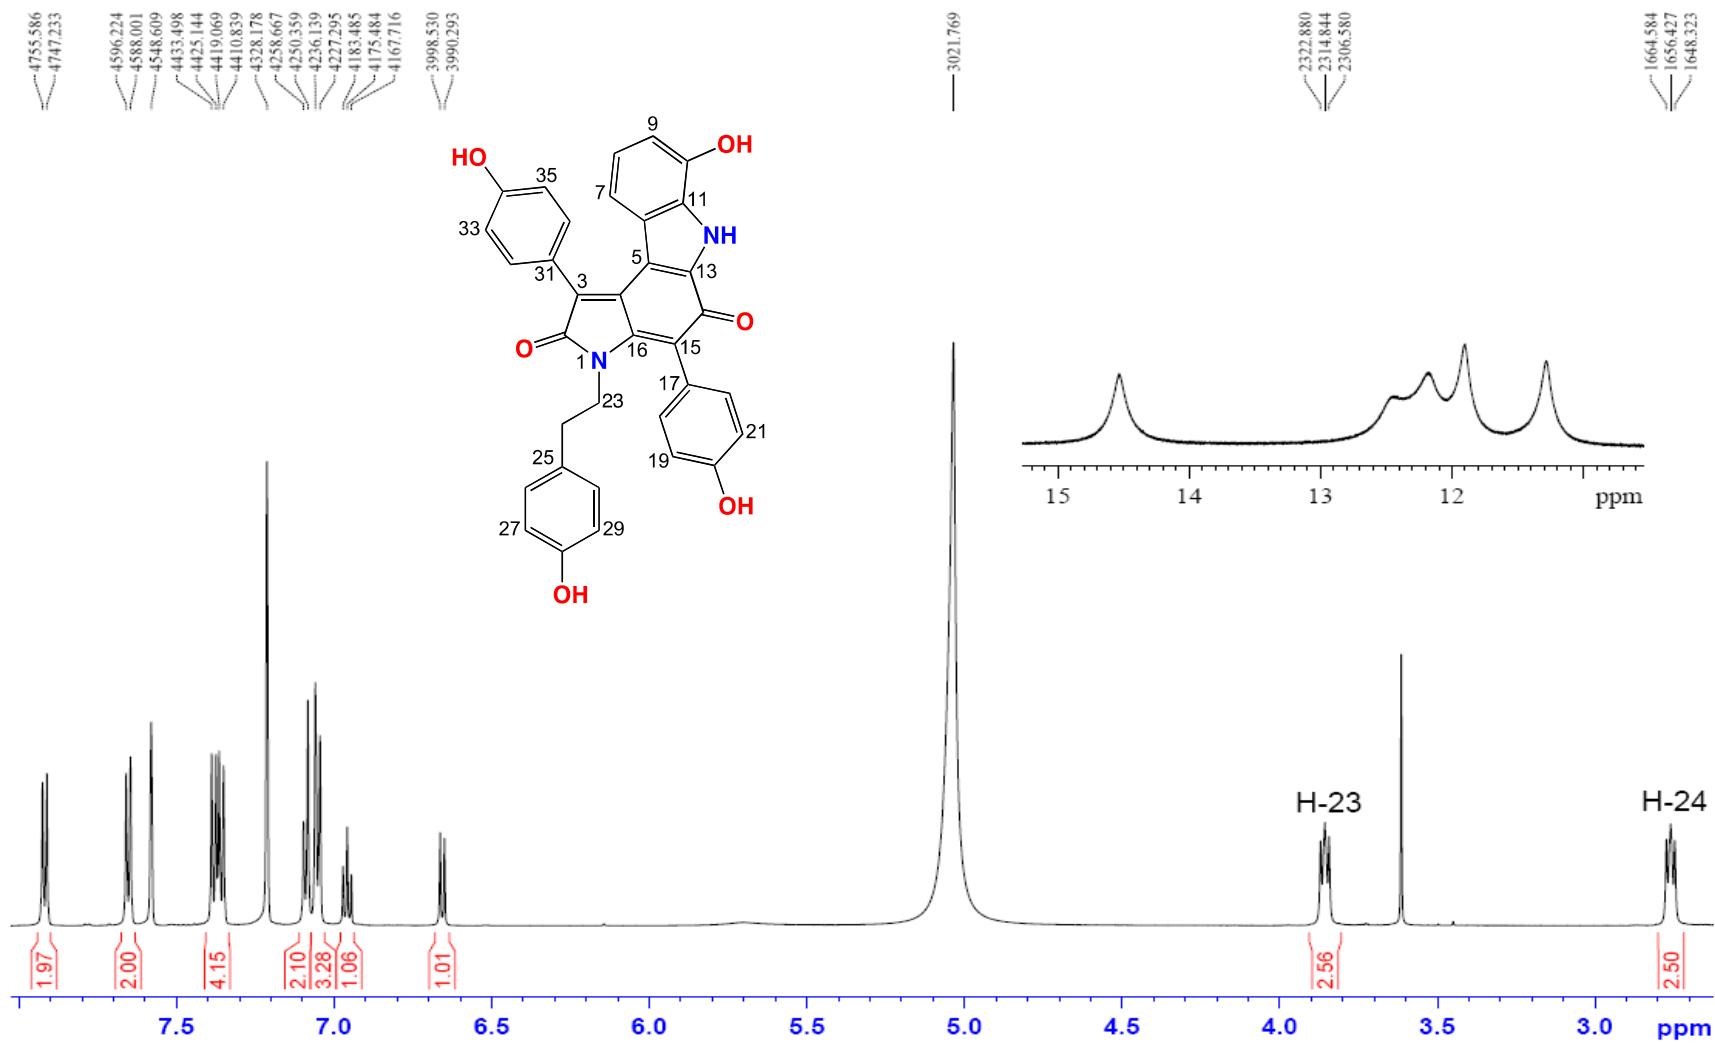

**Figure S1c.**  $^1\text{H}$  NMR (pyridine- $d_5$ , 600 MHz) expansion for dictyodendrin F (**1**).

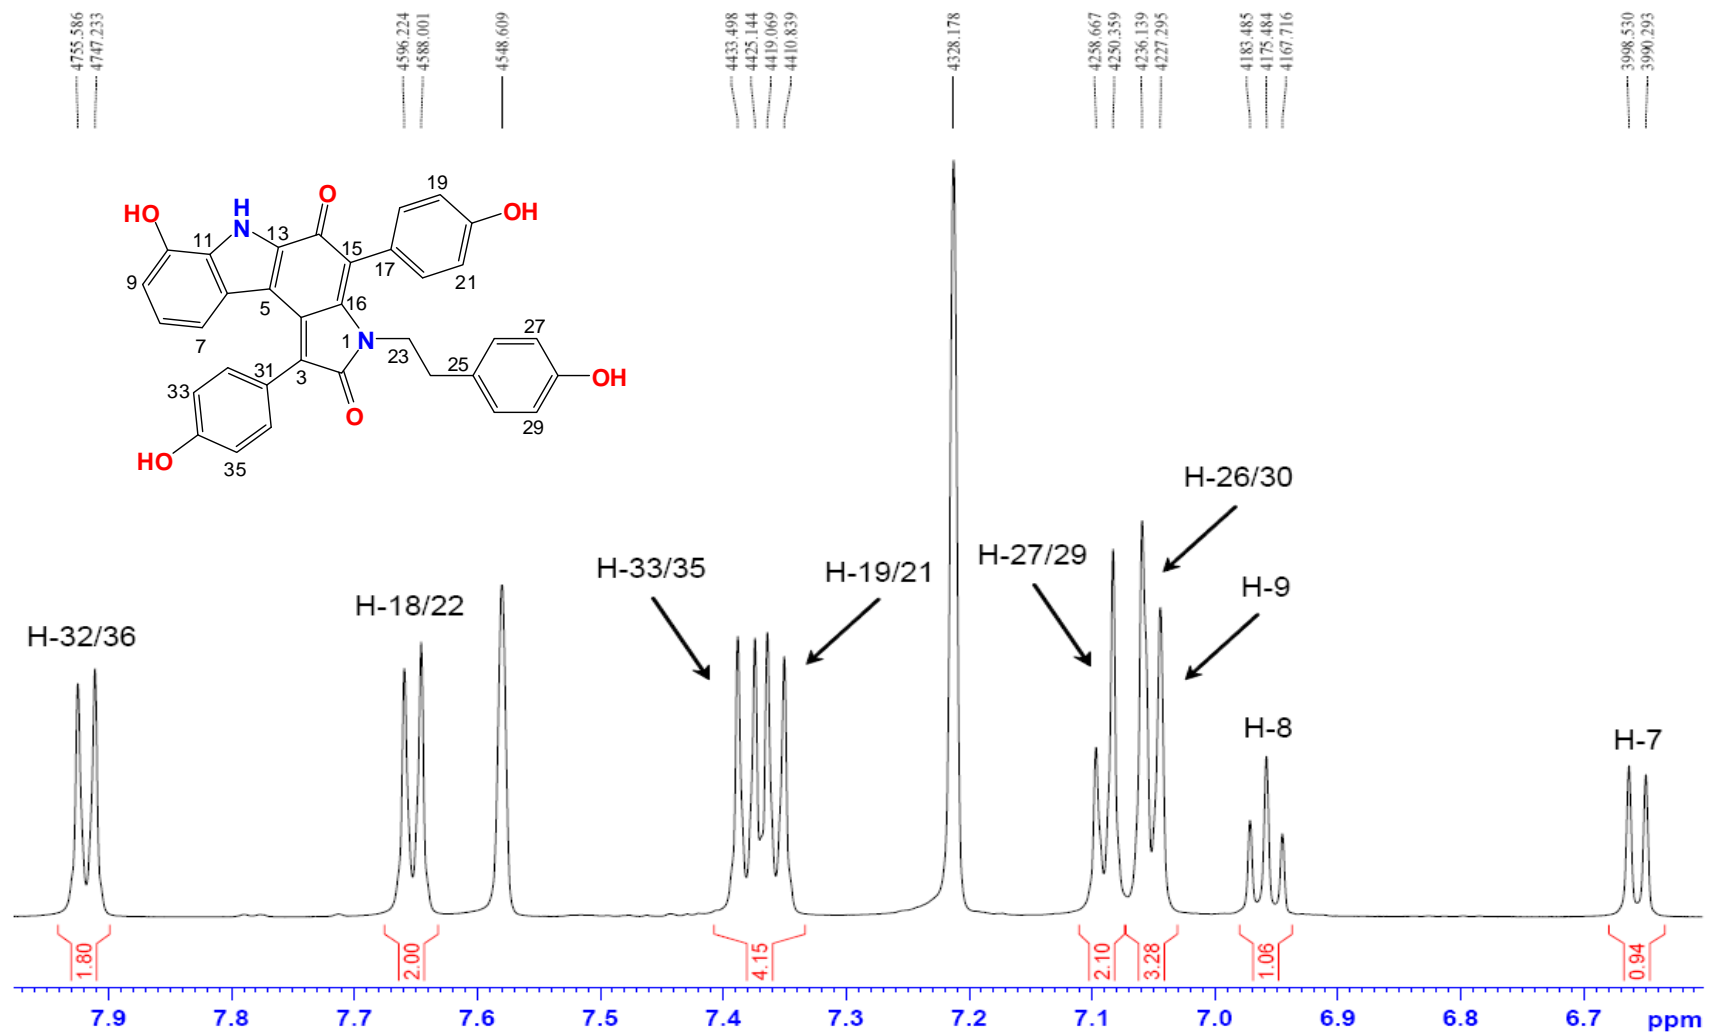

**Figure S1d.**  $^{13}\text{C}$  NMR (pyridine- $d_5$ , 150 MHz) spectrum for dictyodendrin F (**1**).

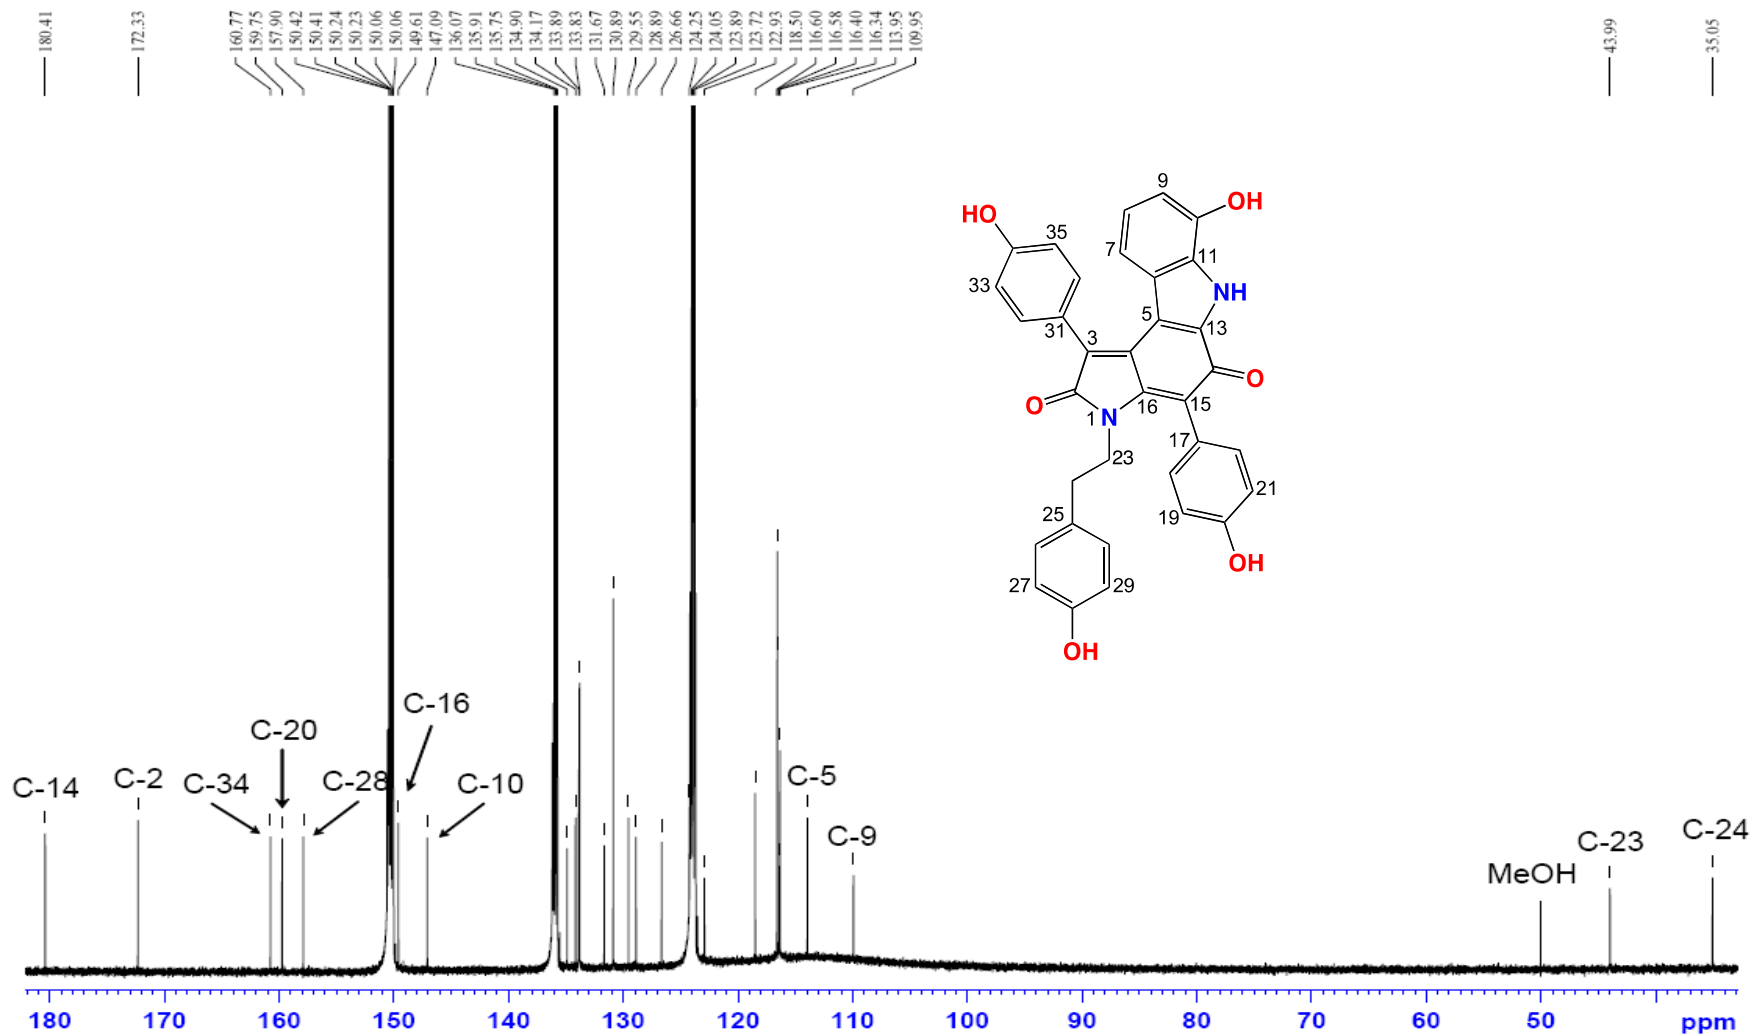

**Figure S1e.**  $^{13}\text{C}$  NMR (pyridine- $d_5$ , 150 MHz) expansion for dictyodendrin F (**1**).

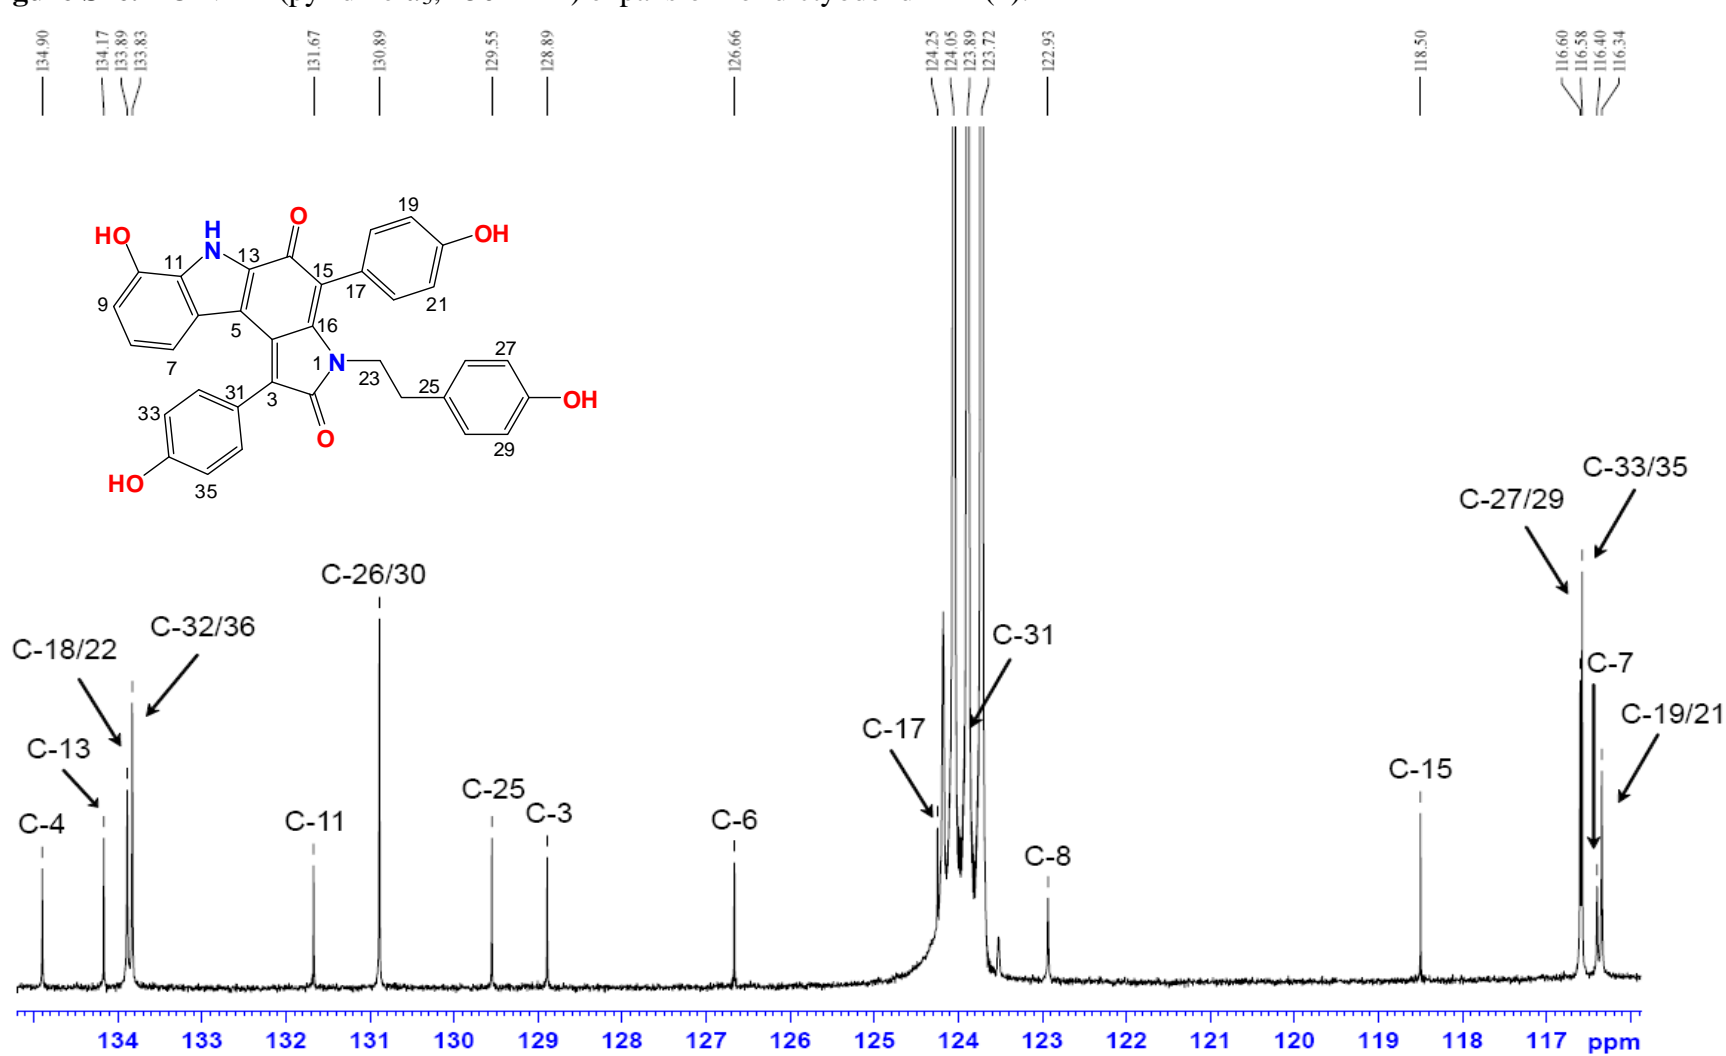

**Figure S1f.** gCOSY (pyridine-*d*<sub>5</sub>, 600 MHz) spectrum for dictyodendrin F (**1**).

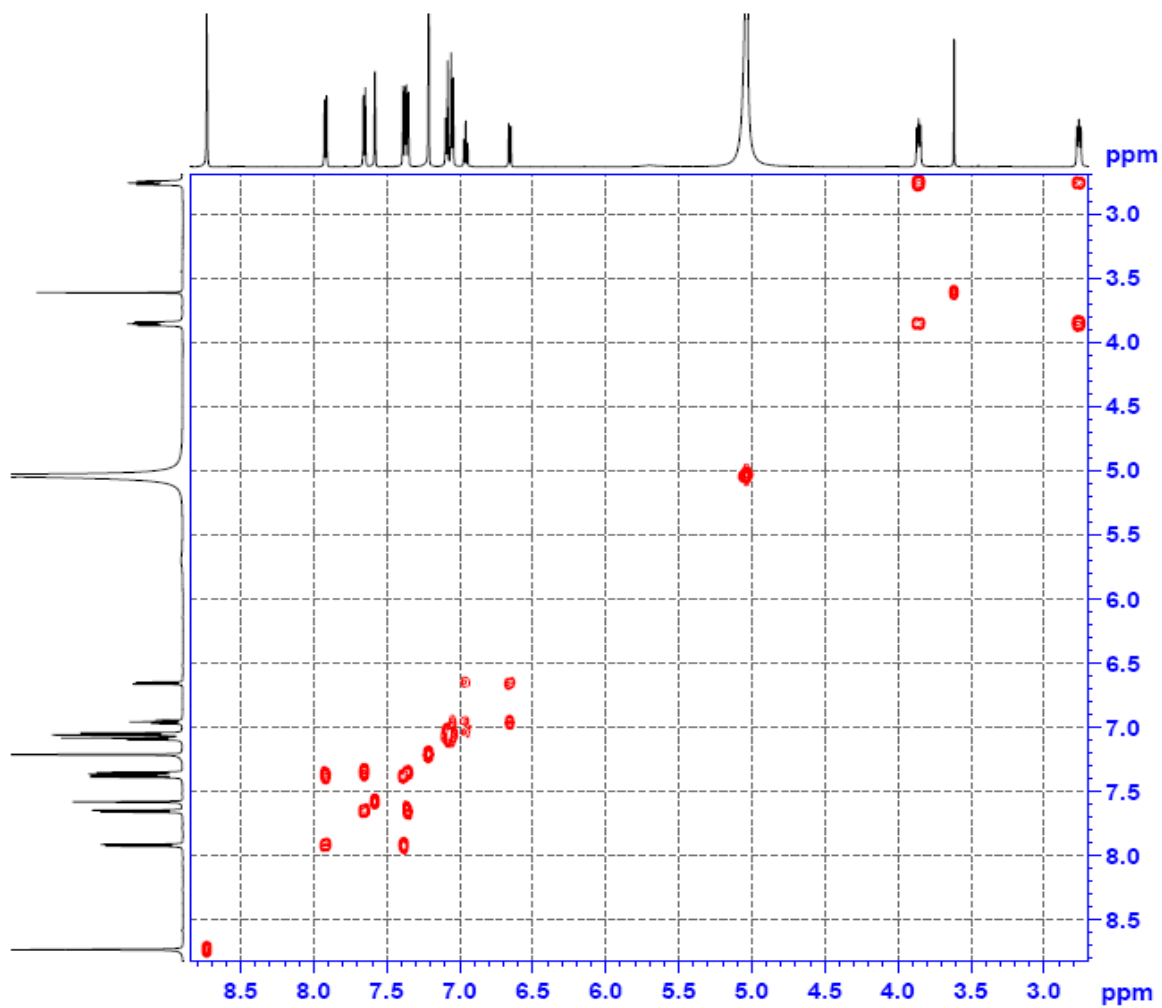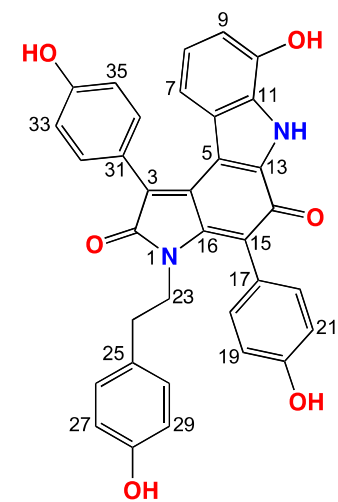

**Figure S1g.** HSQC (pyridine-*d*<sub>5</sub>, 600 MHz) spectrum for dictyodendrin F (**1**).

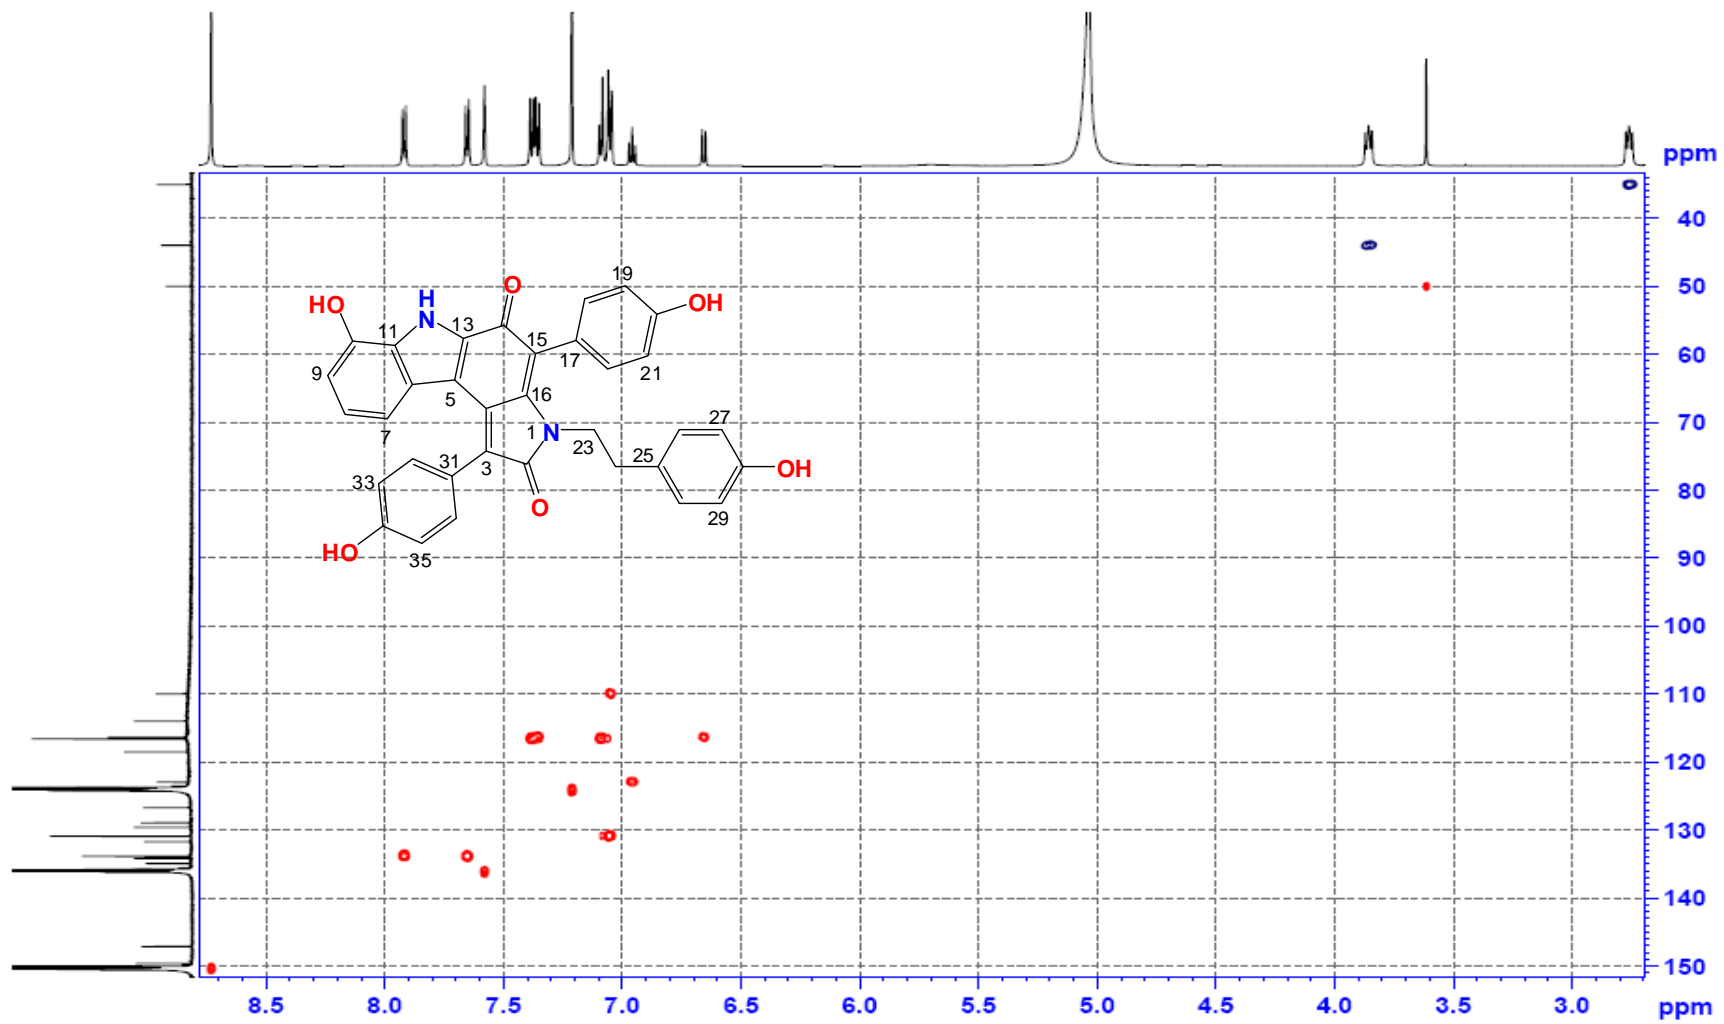

**Figure S1h.** HSQC (pyridine-*d*<sub>5</sub>, 600 MHz) expansion for dictyodendrin F (**1**).

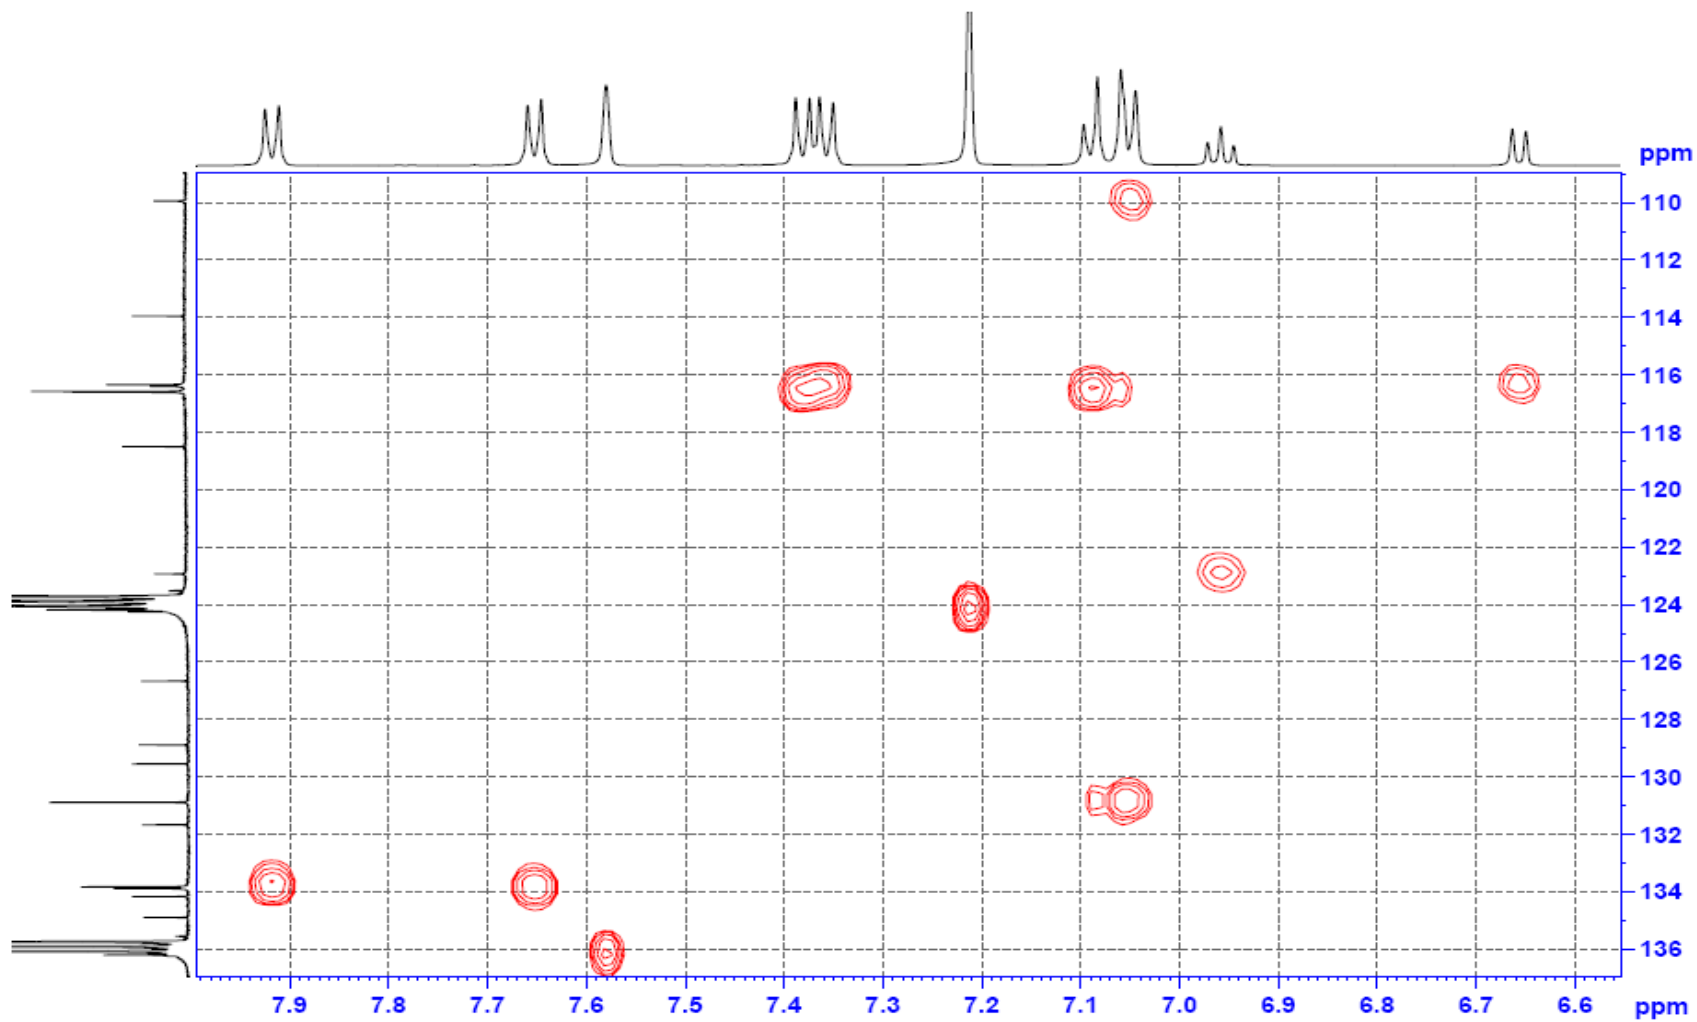



**Figure S1i.** HMBC (pyridine- $d_5$ , 600 MHz) spectrum for dictyodendrin F (**1**).

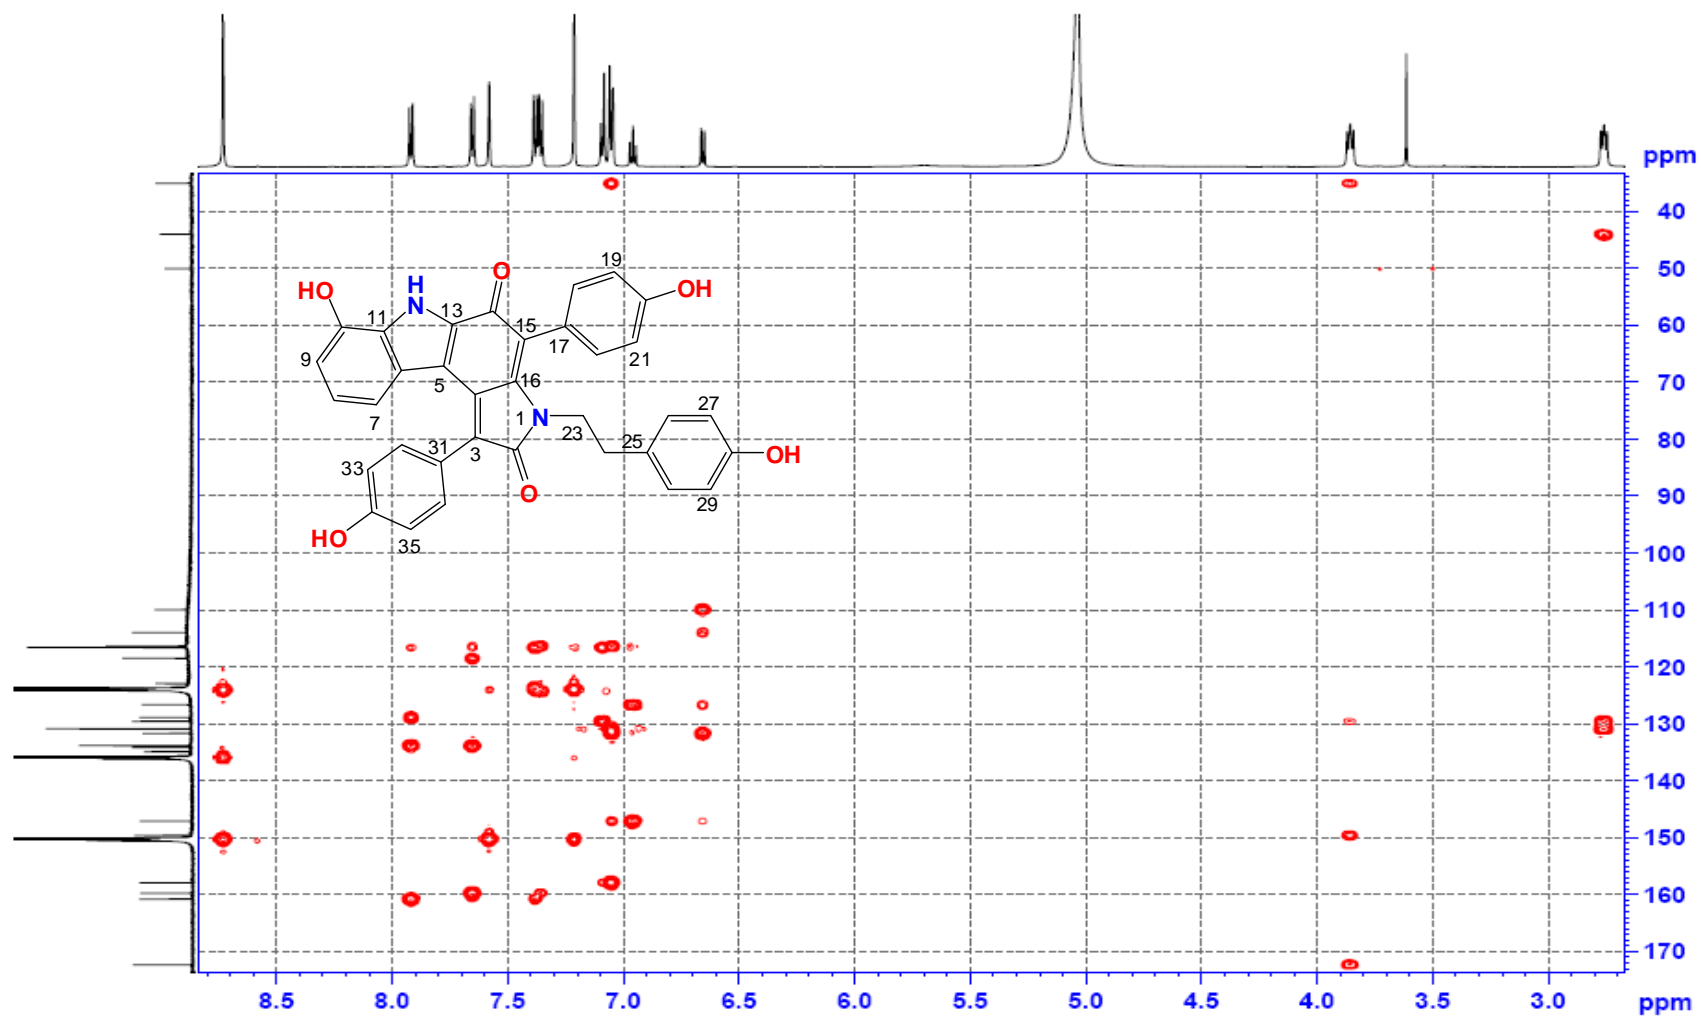

**Figure S1j.** HMBC (pyridine-*d*<sub>5</sub>, 600 MHz) expansion for dictyodendrin F (**1**).

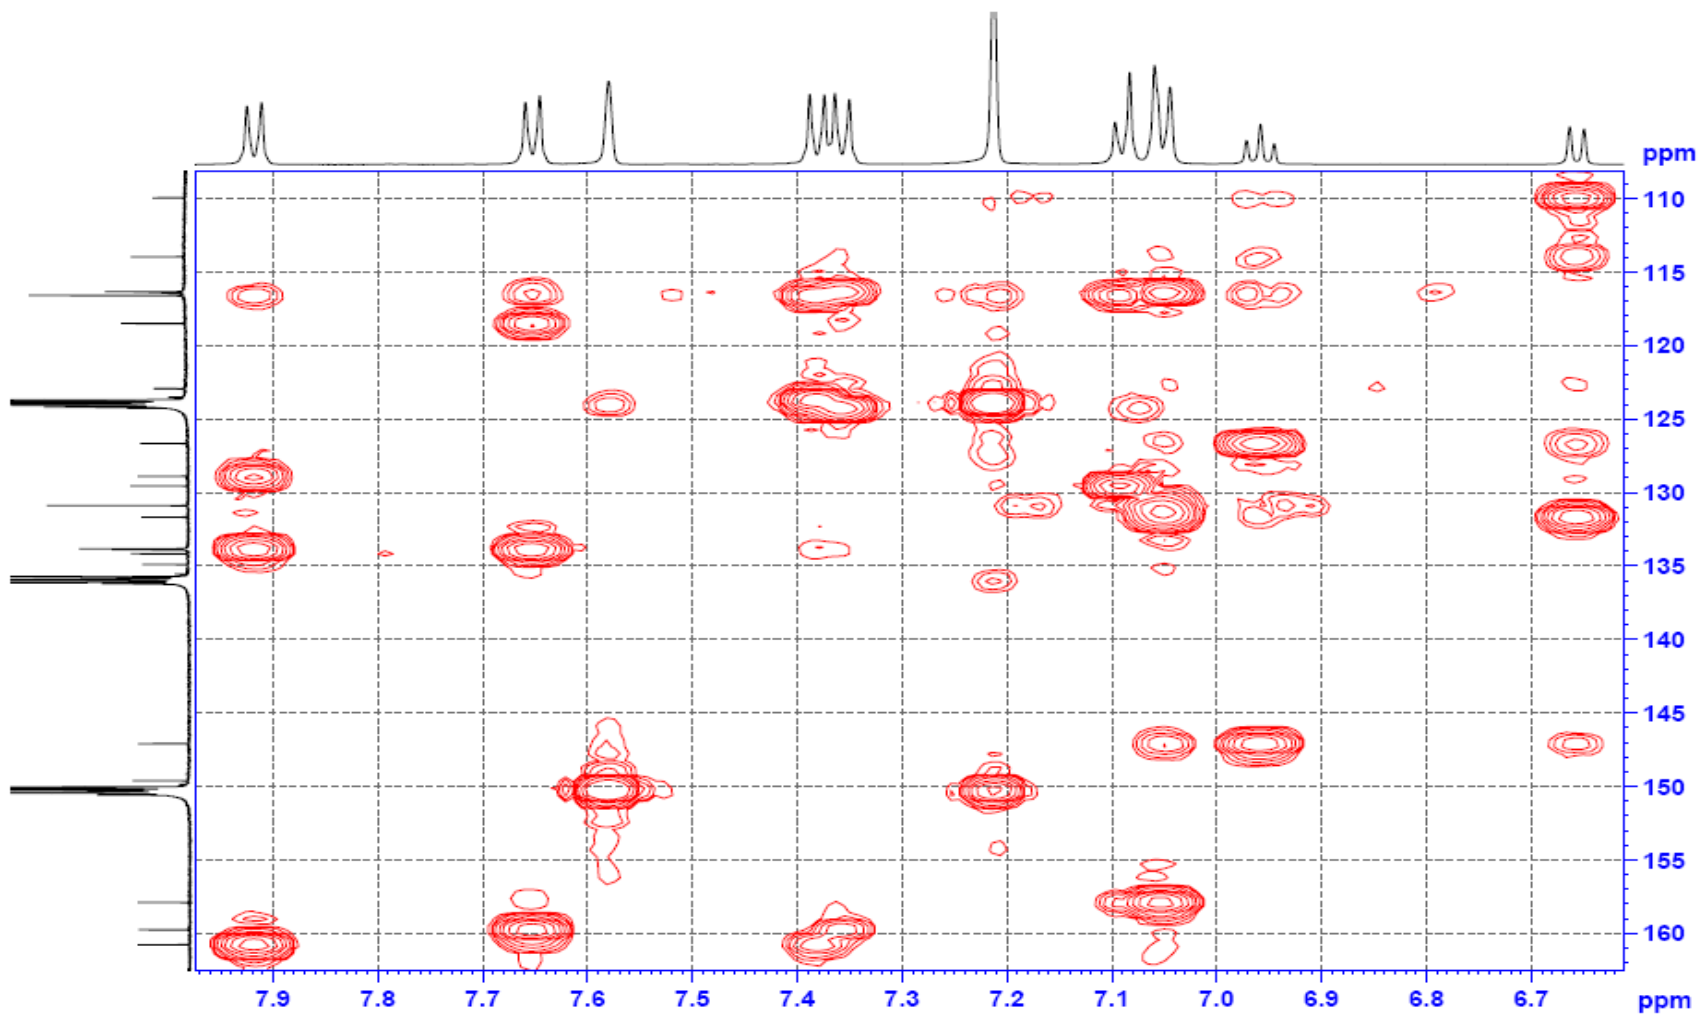

Figure S2. <sup>1</sup>H NMR (pyridine-*d*<sub>5</sub>, 600 MHz) spectrum for dictyodendrin G (2).

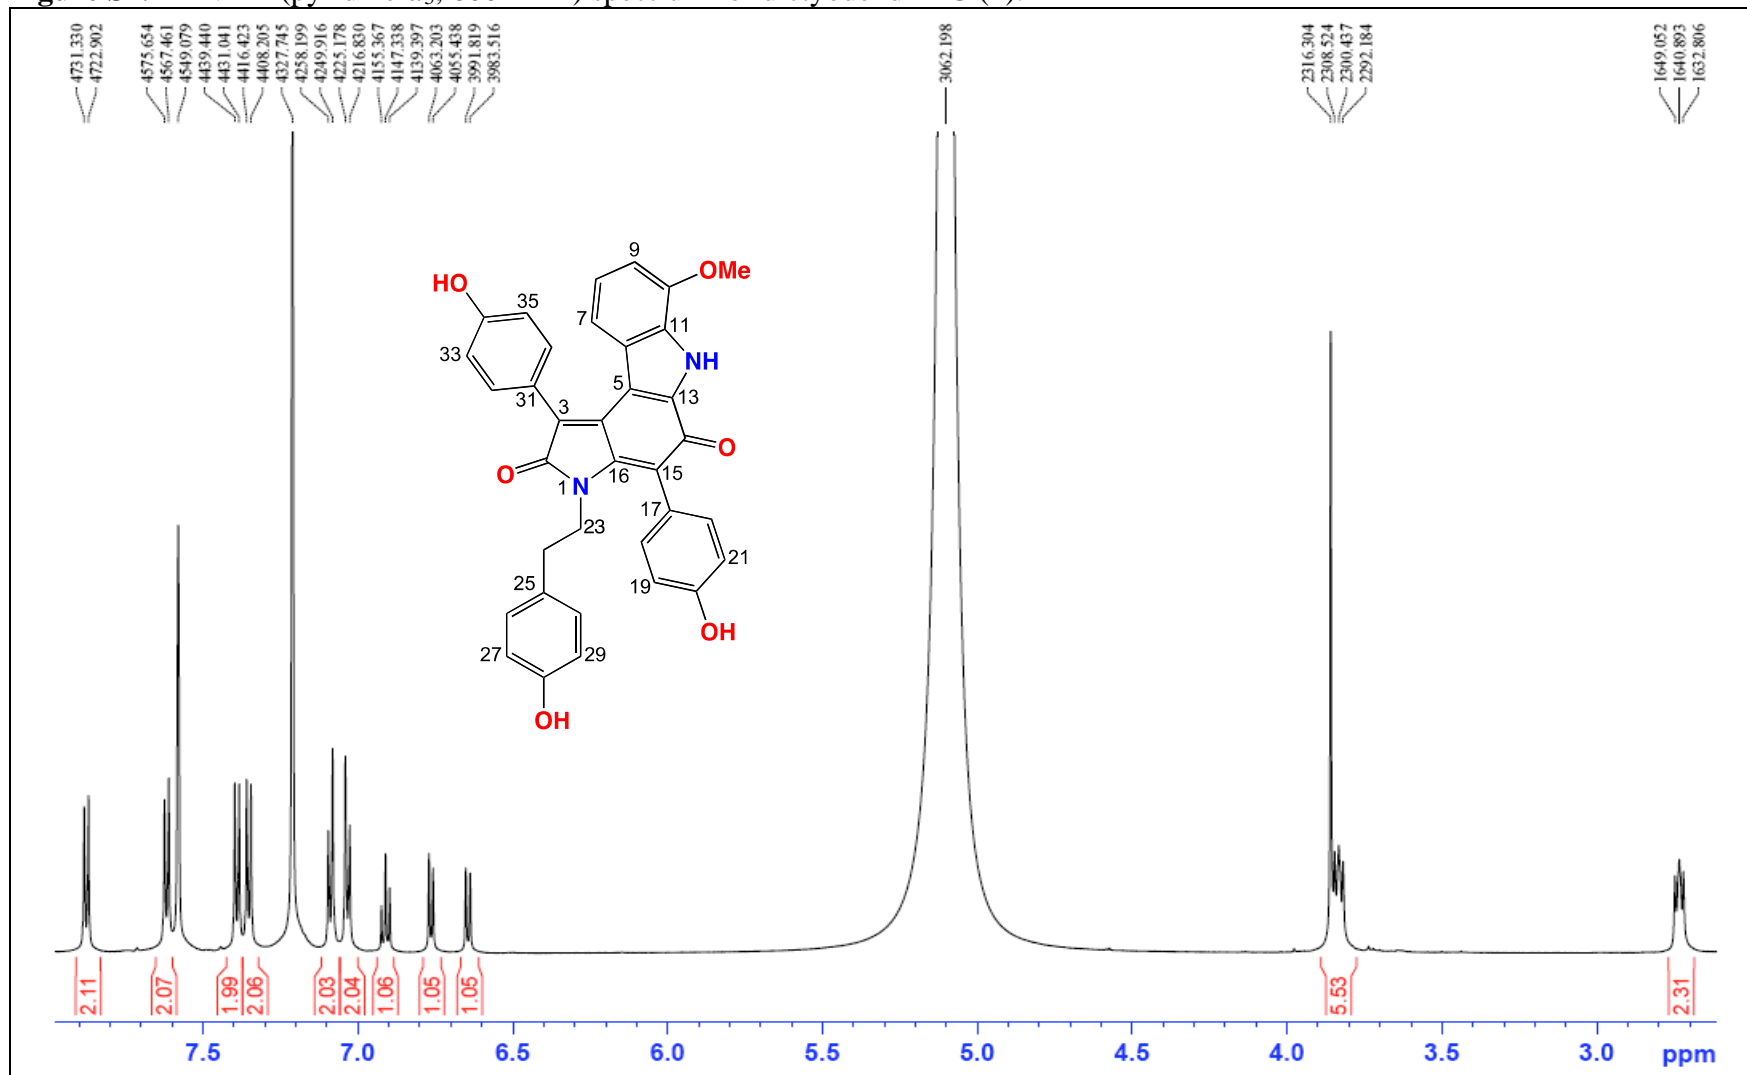

**Figure S3**  $^1\text{H}$  NMR (pyridine- $d_5$ , 600 MHz) spectrum for dictyodendrin H (**3**).

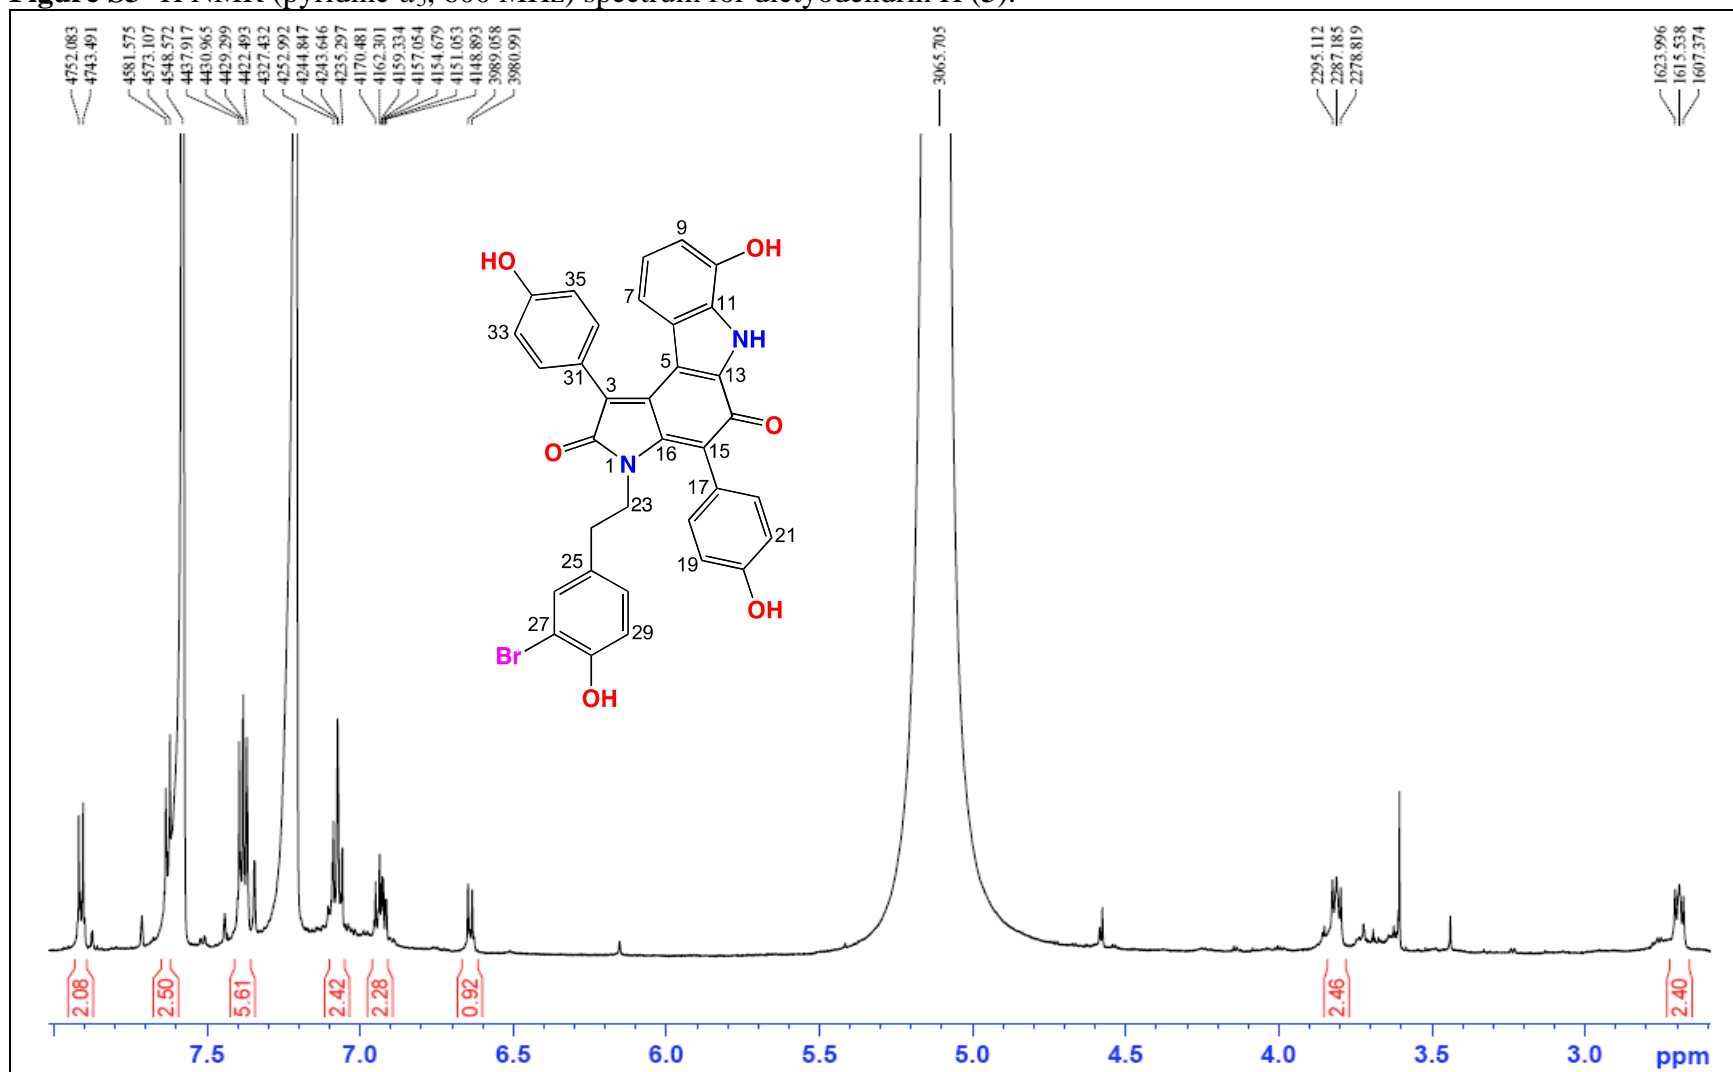

**Figure S4**  $^1\text{H}$  NMR (pyridine- $d_5$ , 600 MHz) spectrum for dictyodendrin I (**4**).

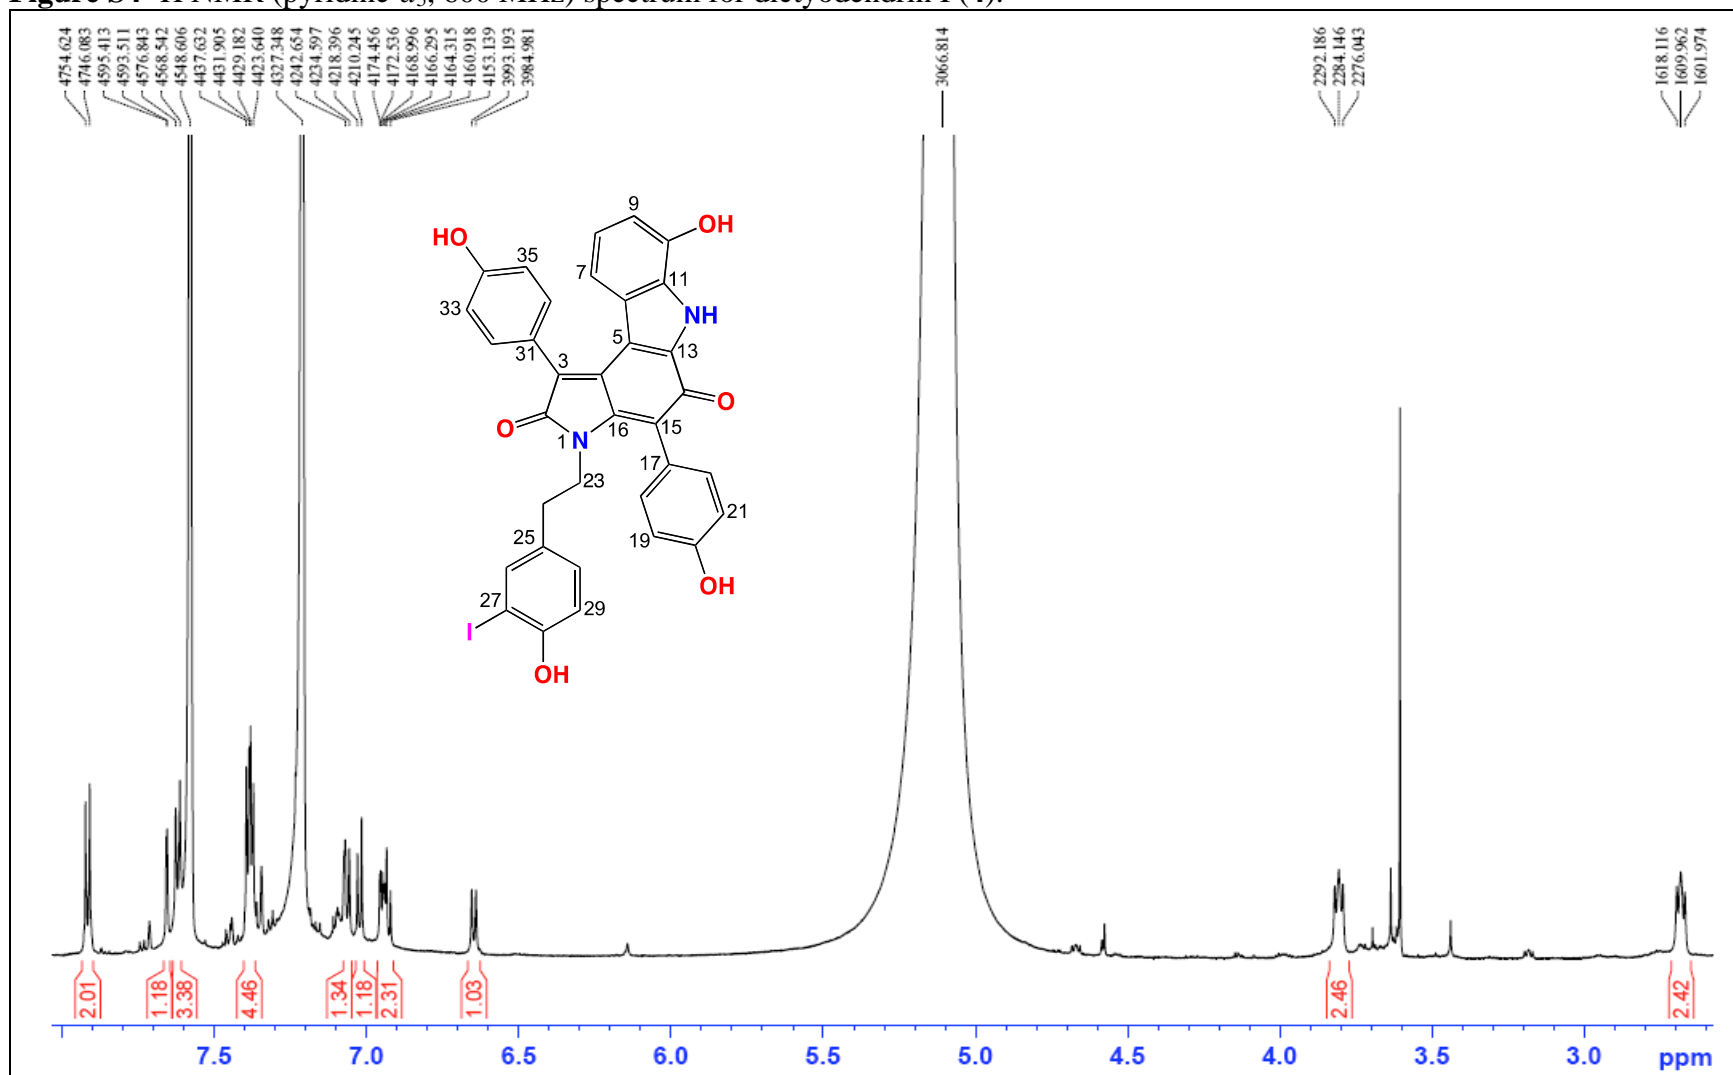

Figure S5  $^1\text{H}$  NMR (MeOH- $d_4$ , 600 MHz) spectrum for dictyodendrin J (5).

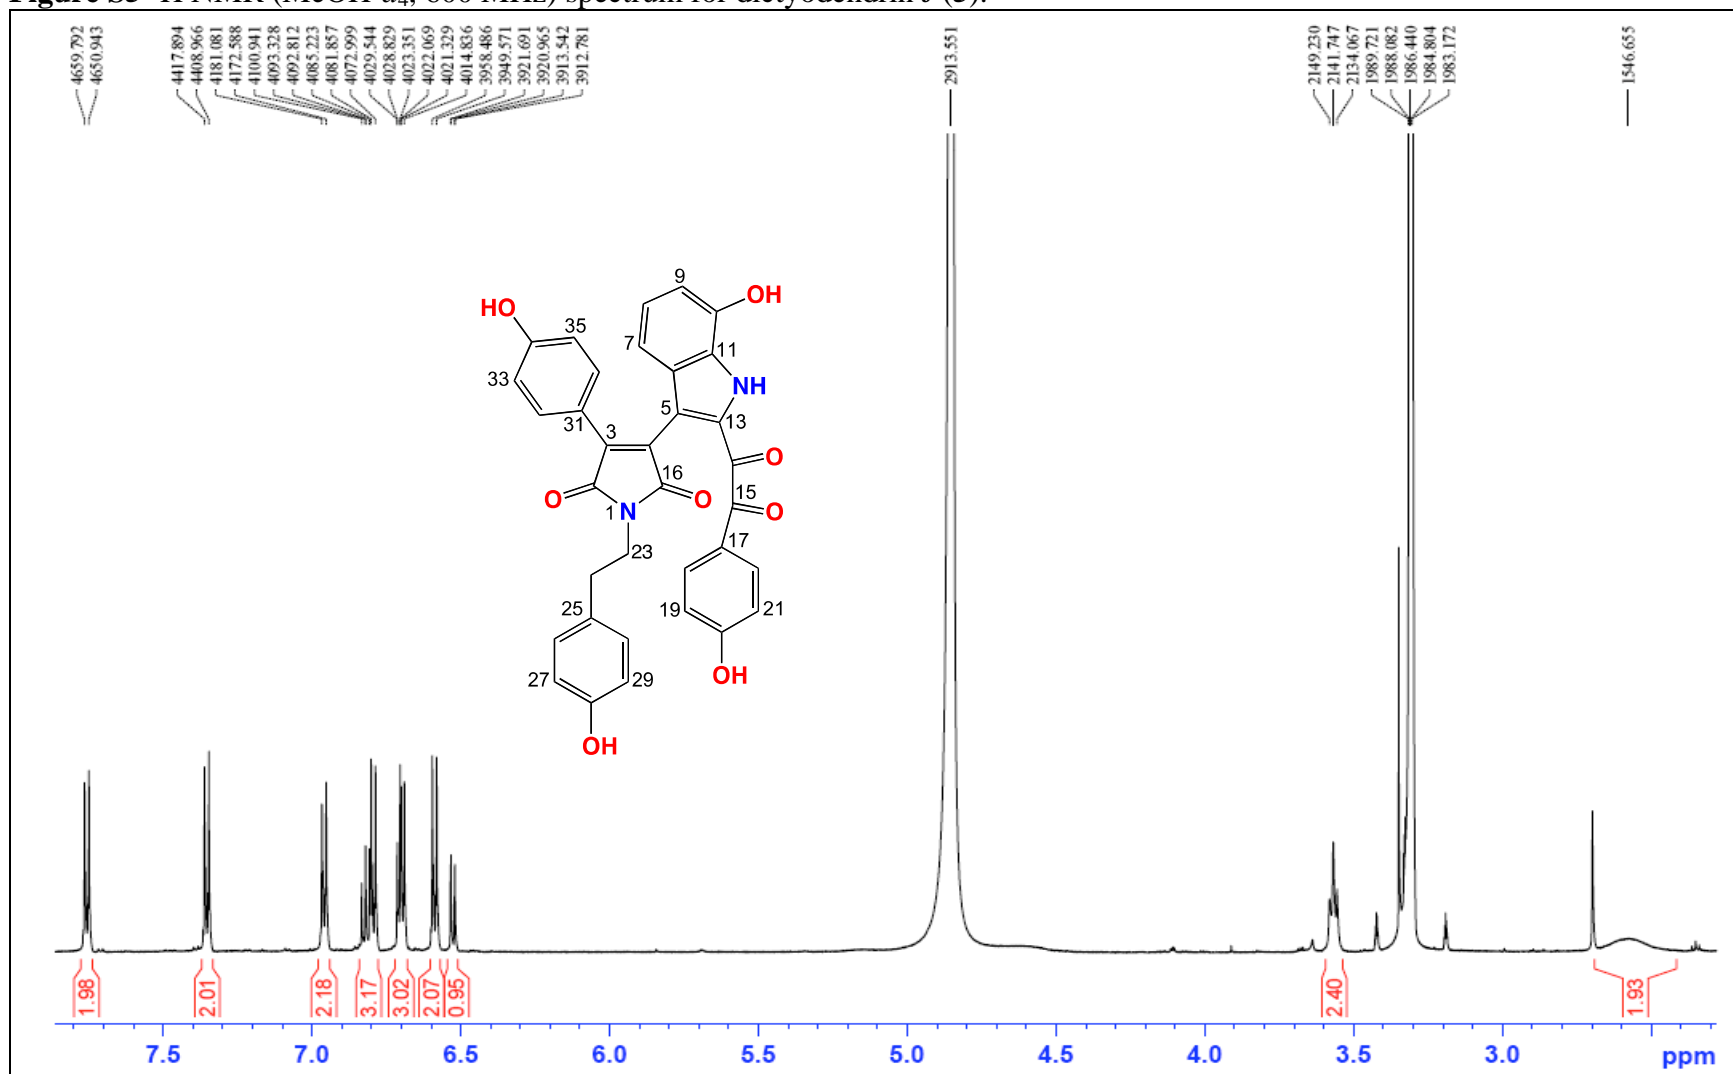

**Figure S6** BACE assay data for compounds **1–5**.

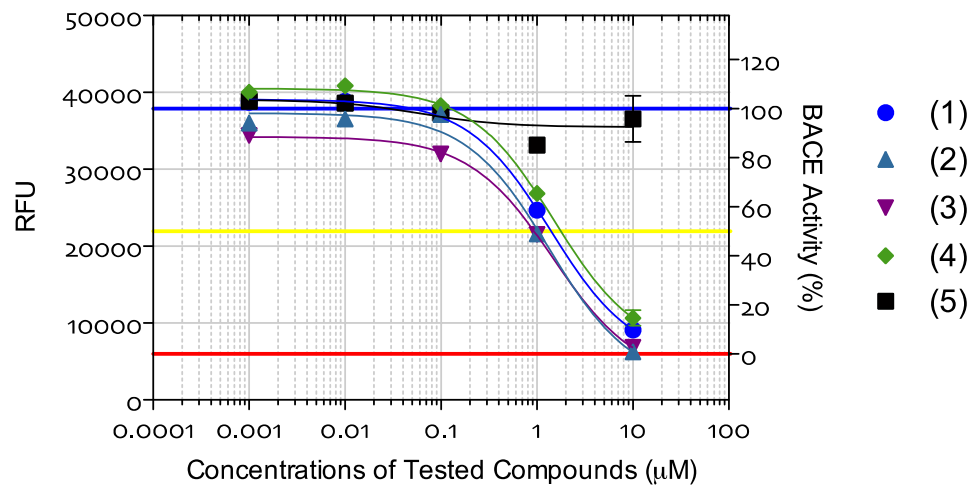

**Figure S7** Antibacterial and antifungal screening results for compounds **1–5**.

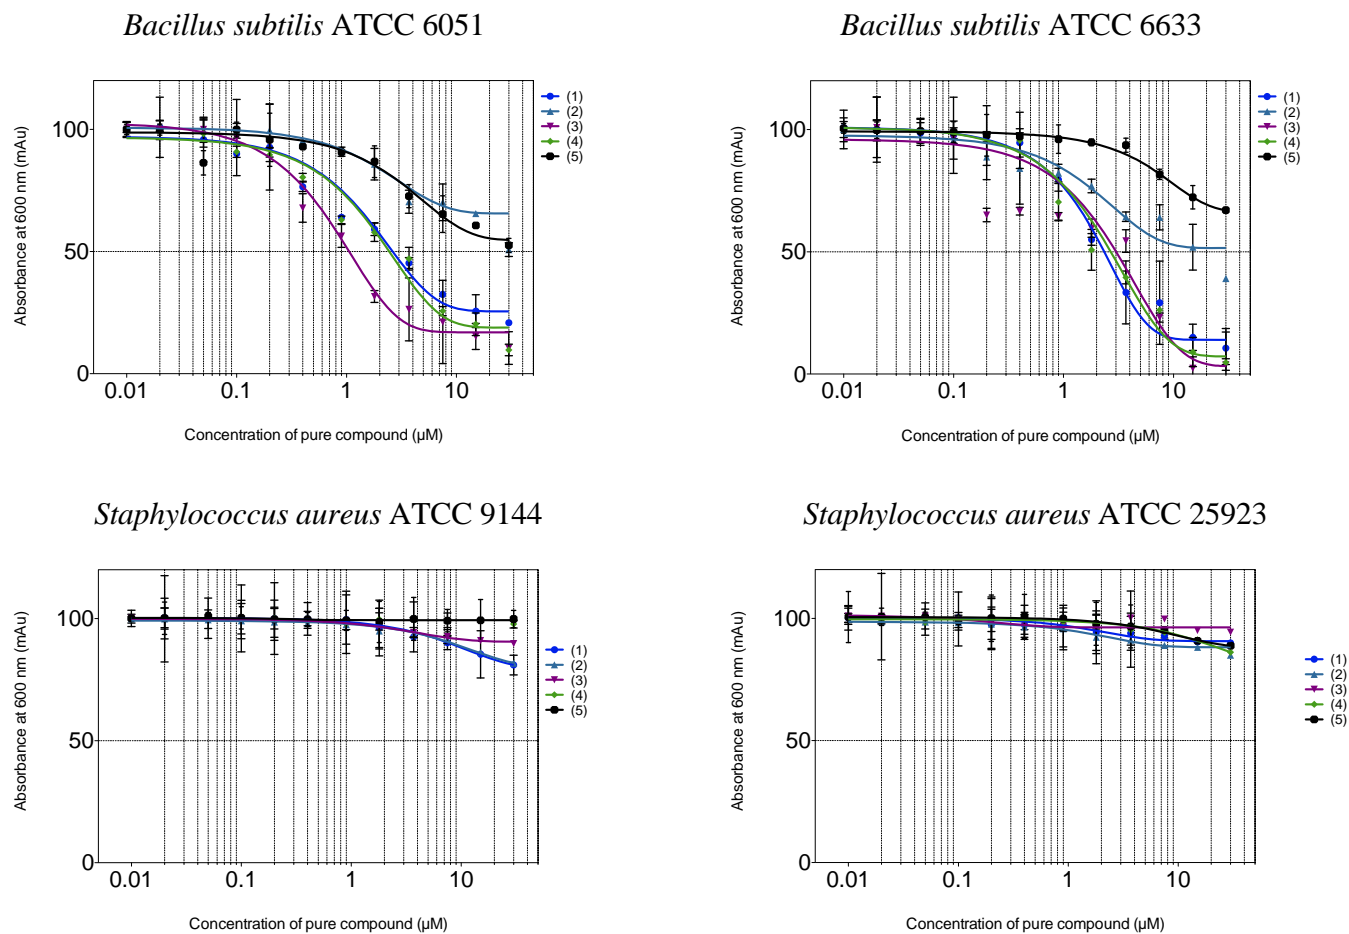



*Escherichia coli* ATCC 11775

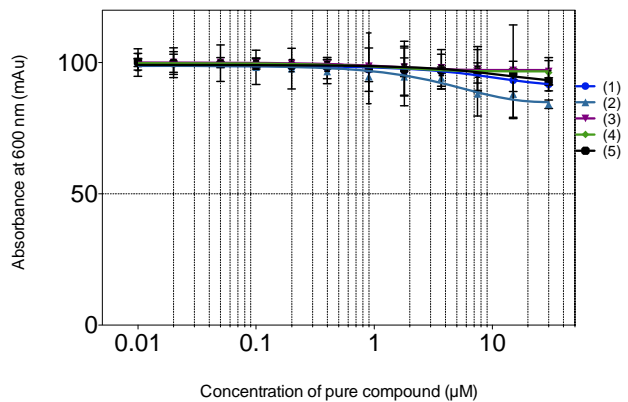

*Pseudomonas aeruginosa* ATCC 10145

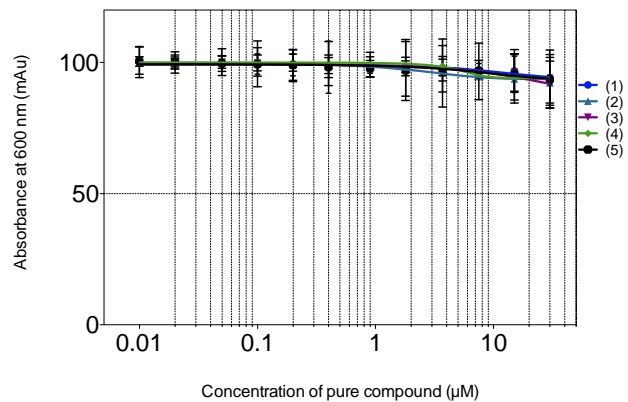

*Candida albicans* ATCC 90028

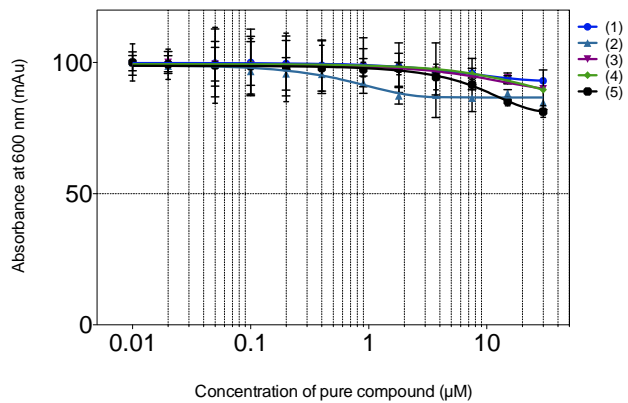

| Compounds | <i>Escherichia coli</i><br>ATCC 11775 |                                       | <i>Pseudomonas aeruginosa</i><br>ATCC 10145 |                                       | <i>Staphylococcus aureus</i> ATCC<br>25923 |                                       | <i>Staphylococcus aureus</i> ATCC<br>9144 |                                       | <i>Bacillus subtilis</i><br>ATCC 6051 |                                       | <i>Bacillus subtilis</i><br>ATCC 6633 |                                       | <i>Candida albicans</i> ATCC<br>90028 |                                       |
|-----------|---------------------------------------|---------------------------------------|---------------------------------------------|---------------------------------------|--------------------------------------------|---------------------------------------|-------------------------------------------|---------------------------------------|---------------------------------------|---------------------------------------|---------------------------------------|---------------------------------------|---------------------------------------|---------------------------------------|
|           | MIC<br>( $\mu\text{M}$ )              | IC <sub>50</sub><br>( $\mu\text{M}$ ) | MIC<br>( $\mu\text{M}$ )                    | IC <sub>50</sub><br>( $\mu\text{M}$ ) | MIC<br>( $\mu\text{M}$ )                   | IC <sub>50</sub><br>( $\mu\text{M}$ ) | MIC<br>( $\mu\text{M}$ )                  | IC <sub>50</sub><br>( $\mu\text{M}$ ) | MIC<br>( $\mu\text{M}$ )              | IC <sub>50</sub><br>( $\mu\text{M}$ ) | MIC<br>( $\mu\text{M}$ )              | IC <sub>50</sub><br>( $\mu\text{M}$ ) | MIC<br>( $\mu\text{M}$ )              | IC <sub>50</sub><br>( $\mu\text{M}$ ) |
| (1)       | --                                    | --                                    | --                                          | --                                    | --                                         | --                                    | --                                        | --                                    | 7.5                                   | 2.7                                   | 3.7                                   | 2.3                                   | --                                    | --                                    |
| (2)       | --                                    |                                       | --                                          | --                                    | --                                         | --                                    | --                                        | --                                    | --                                    | --                                    | --                                    | --                                    | --                                    | --                                    |
| (3)       | --                                    |                                       | --                                          | --                                    | --                                         | --                                    | --                                        | --                                    | 1.8                                   | 1.2                                   | 7.5                                   | 3.1                                   | --                                    | --                                    |
| (4)       | --                                    | --                                    | --                                          | --                                    | --                                         | --                                    | --                                        | --                                    | 7.5                                   | 2.5                                   | 3.7                                   | 2.8                                   | --                                    | --                                    |
| (5)       | --                                    | --                                    | --                                          | --                                    | --                                         | --                                    | --                                        | --                                    | --                                    | --                                    | --                                    | --                                    | --                                    | --                                    |
